# Supplementary material for: Bacillus velezensis SQR9 sways the rhizosphere community and its sociality toward cooperation and plant growth promotion
Source: bioRxiv preprint, doi:10.1101/2022.10.11.511700, version 1 (2022-10-11)
Supplement: Supplemental Table S2 [file 511700_file15.xlsx]

## Sheet: Figure 2E
non-SQR9-inoculated Fig.2E	Subject id	species	% identity	alignment length	mismatches	gap openings	q. start	q. end	s. start	s. end	e-value	bit score	% identity to SQR9 (Cluster Omega)
Uniq1191	CACSIW010000002.1:286203-288701	Bacillus sp.	86.889	450	59	0	1	450	349	798	4.14e-143	505	60.4
Uniq1299	CACSIW010000002.1:286203-288701	Bacillus sp.	86.889	450	59	0	1	450	349	798	4.14e-143	505	60.18
Uniq1978	CACSIW010000002.1:286203-288701	Bacillus sp.	86.889	450	59	0	1	450	349	798	4.14e-143	505	60.18
Uniq2187	CACSIW010000002.1:286203-288701	Bacillus sp.	87.778	450	55	0	1	450	349	798	8.84e-150	527	60.18
Uniq2483	CACSIW010000002.1:286203-288701	Bacillus sp.	87.111	450	58	0	1	450	349	798	8.91e-145	510	60.4
Uniq2657	CACSIW010000002.1:286203-288701	Bacillus sp.	87.333	450	57	0	1	450	349	798	1.91e-146	516	59.96
Uniq3243	CACSIW010000002.1:286203-288701	Bacillus sp.	87.556	450	56	0	1	450	349	798	4.11e-148	521	60.18
Uniq3247	CACSIW010000002.1:286203-288701	Bacillus sp.	87.111	450	58	0	1	450	349	798	8.91e-145	510	60.85
Uniq4188	CACSIW010000002.1:286203-288701	Bacillus sp.	87.333	450	57	0	1	450	349	798	1.91e-146	516	60.18
Uniq4216	CP039727.1:6982-9354	Bacillus sp.	80.405	444	85	2	1	443	331	773	1.6e-92	337	70.44
Uniq1490	CP050448.1:7012-9414	Bacillus velezensis	98.889	450	5	0	1	450	343	792	0	804	98.89
Uniq1885	CP050448.1:7012-9414	Bacillus velezensis	99.111	450	4	0	1	450	343	792	0	809	99.11
Uniq28	CP050448.1:7012-9414	Bacillus velezensis	99.111	450	4	0	1	450	343	792	0	809	99.11
Uniq4	CP050448.1:7012-9414	Bacillus velezensis	99.333	450	3	0	1	450	343	792	0	815	99.33
Uniq1104	NTXX01000006.1:199563-201953	Bacillus sp.	99.111	450	4	0	1	450	331	780	0	809	71.56
Uniq1246	NTXX01000006.1:199563-201953	Bacillus sp.	99.111	450	4	0	1	450	331	780	0	809	71.33
Uniq1340	NTXX01000006.1:199563-201953	Bacillus sp.	99.111	450	4	0	1	450	331	780	0	809	71.56
Uniq1690	NTXX01000006.1:199563-201953	Bacillus sp.	99.333	450	3	0	1	450	331	780	0	815	71.56
Uniq1818	NTXX01000006.1:199563-201953	Bacillus sp.	99.333	450	3	0	1	450	331	780	0	815	71.33
Uniq1933	NTXX01000006.1:199563-201953	Bacillus sp.	99.111	450	4	0	1	450	331	780	0	809	71.33
Uniq2190	NTXX01000006.1:199563-201953	Bacillus sp.	99.111	450	4	0	1	450	331	780	0	809	71.56
Uniq2331	NTXX01000006.1:199563-201953	Bacillus sp.	99.333	450	3	0	1	450	331	780	0	815	71.56
Uniq2503	NTXX01000006.1:199563-201953	Bacillus sp.	99.111	450	4	0	1	450	331	780	0	809	71.78
Uniq2801	NTXX01000006.1:199563-201953	Bacillus sp.	99.333	450	3	0	1	450	331	780	0	815	71.56
Uniq4193	NUNF01000043.1:40188-42602	Bacillus sp.	99.556	450	2	0	1	450	334	783	0	821	70.44
Uniq2855	NUOW01000028.1:313-2715	Bacillus sp.	80.931	451	84	2	1	450	334	783	4.42e-98	355	69.78
Uniq2610	VEBG01000002.1:396-2804	Bacillus safensis	99.111	450	4	0	1	450	343	792	0	809	71.78
Uniq3284	VEBG01000002.1:396-2804	Bacillus safensis	99.111	450	4	0	1	450	343	792	0	809	72
Uniq4518	VEBG01000002.1:396-2804	Bacillus safensis	99.333	450	3	0	1	450	343	792	0	815	71.78
Uniq1016	CP001672.1	Methylotenera mobilis	370/441(84%)	441		0/441(0%)	1	441	1077921	1078361	2e-113	422 bits(228)	58.84
Uniq102	CP066681.1	Micavibrio aeruginosavorus	333/456(73%)	450		9/456(1%)	1	450	1304892	1305344	2e-32	152 bits(82)	56.6
Uniq1026	CP061319.1	Polynucleobacter sp.	297/388(77%)	380		16/388(4%)	1	380	1431254	1431633	3e-46	198 bits(107)	54.36
Uniq1030	CP061319.1	Polynucleobacter sp.	284/376(76%)	371		10/376(2%)	10	380	1431254	1431624	1e-39	176 bits(95)	55.93
Uniq1043	CP073759.1	Methylophilaceae bacterium	366/448(82%)	444		5/448(1%)	7	450	115031	115477	2e-97	368 bits(199)	58.17
Uniq1046	CP061319.1	Polynucleobacter sp.	291/385(76%)	380		10/385(2%)	1	380	1431254	1431633	3e-41	182 bits(98)	55.7
Uniq105	CP073759.1	Methylophilaceae bacterium	364/451(81%)	447		5/451(1%)	4	450	115031	115480	1e-90	346 bits(187)	57.72
Uniq106	CP073759.1	Methylophilaceae bacterium	364/451(81%)	447		5/451(1%)	4	450	115031	115480	1e-90	346 bits(187)	57.72
Uniq1066	LN794158.1	Candidatus Methylopumilus turicensis	359/451(80%)	450		2/451(0%)	1	450	736097	736546	2e-83	322 bits(174)	55.7
Uniq1072	AP019368.1	Silvanigrellales bacterium	333/446(75%)	442		8/446(1%)	4	445	7265	7706	5e-44	191 bits(103)	56.44
Uniq1073	CP001672.1	Methylotenera mobilis	327/408(80%)	407		2/408(0%)	1	407	1077921	1078327	6e-78	303 bits(164)	56.15
Uniq1079	CP061319.1	Polynucleobacter sp.	284/376(76%)	371		10/376(2%)	10	380	1431254	1431624	1e-39	176 bits(95)	55.7
Uniq1083	LR828264.1	Xanthomonas hortorum pv. taraxaci	55/63(87%)	63		0/63(0%)	169	231	3036176	3036238	2e-08	73.1 bits(39)	54.44
Uniq1095	CP015010.1	Rickettsia bellii	211/274(77%)	268		12/274(4%)	53	320	1341735	1342002	1e-30	147 bits(79)	58.89
Uniq1102	CP061319.1	Polynucleobacter sp.	292/385(76%)	380		10/385(2%)	1	380	1431254	1431633	7e-43	187 bits(101)	55.48
Uniq1112	CP049634.1	Polynucleobacter paneuropaeus	331/450(74%)	441		18/450(4%)	10	450	1306592	1307032	2e-33	156 bits(84)	55.93
Uniq1114	LN794158.1	Candidatus Methylopumilus turicensis	360/451(80%)	450		2/451(0%)	1	450	736097	736546	4e-85	327 bits(177)	54.81
Uniq112	CP073759.1	Methylophilaceae bacterium	359/445(81%)	441		5/445(1%)	10	450	115031	115474	5e-89	340 bits(184)	57.72
Uniq1127	CP002056.1	Methylotenera versatilis	363/441(82%)	440		2/441(0%)	1	440	1319086	1319525	3e-101	381 bits(206)	57.27
Uniq1147	LR828264.1	Xanthomonas hortorum pv. taraxaci	55/63(87%)	63		0/63(0%)	169	231	3036176	3036238	2e-08	73.1 bits(39)	54.67
Uniq1165	CP041030.1	Francisella sp.	78/89(88%)	89		0/89(0%)	124	212	482919	483007	7e-18	104 bits(56)	59.06
Uniq1166	CP048031.1	Shewanella sp.	59/68(87%)	68		0/68(0%)	145	212	2642590	2642657	2e-09	76.8 bits(41)	60.22
Uniq1169	CP002961.1	Emticicia oligotrophica	28/28(100%)	28		0/28(0%)	70	97	4681309	4681336	0.026	52.8 bits(28)	58.5
Uniq1178	CP073339.1	Prevotella denticola	59/70(84%)	69		1/70(1%)	169	237	2583215	2583284	9e-07	67.6 bits(36)	56.38
Uniq118	CP073759.1	Methylophilaceae bacterium	367/454(81%)	450		5/454(1%)	1	450	115031	115483	2e-92	351 bits(190)	57.94
Uniq1195	LN794158.1	Candidatus Methylopumilus turicensis	359/451(80%)	450		2/451(0%)	1	450	736097	736546	2e-83	322 bits(174)	55.93
Uniq122													59.41
Uniq1229	LR828264.1	Xanthomonas hortorum pv. taraxaci	55/63(87%)	63		0/63(0%)	169	231	3036176	3036238	2e-08	73.1 bits(39)	54.44
Uniq123	CP001672.1	Methylotenera mobilis	362/442(82%)	440		4/442(0%)	1	440	1077921	1078360	6e-98	370 bits(200)	57.94
Uniq1232	CP002961.1	Emticicia oligotrophica	28/28(100%)	28		0/28(0%)	70	97	4681309	4681336	0.026	52.8 bits(28)	58.73
Uniq1242	CP029640.1	Paraburkholderia dokdonella	278/372(75%)	371		2/372(0%)	10	380	2182750	2183120	3e-36	165 bits(89)	57.72
Uniq1243	CP001672.1	Methylotenera mobilis	358/442(81%)	440		4/442(0%)	1	440	1077921	1078360	3e-91	348 bits(188)	57.72
Uniq1251	CP061319.1	Polynucleobacter sp.	291/385(76%)	380		10/385(2%)	1	380	1431254	1431633	3e-41	182 bits(98)	55.48
Uniq126	CP073759.1	Methylophilaceae bacterium	365/451(81%)	447		5/451(1%)	4	450	115031	115480	2e-92	351 bits(190)	57.72
Uniq1286	CP033953.1	Methylomonas clara	339/420(81%)	419		2/420(0%)	1	419	2300711	2301129	1e-84	326 bits(176)	57.49
Uniq1295	CP061319.1	Polynucleobacter sp.	289/382(76%)	377		10/382(2%)	4	380	1431254	1431630	3e-41	182 bits(98)	55.48
Uniq1296	CP002961.1	Emticicia oligotrophica	28/28(100%)	28		0/28(0%)	70	97	4681309	4681336	0.026	52.8 bits(28)	58.73
Uniq130	CP066681.1	Micavibrio aeruginosavorus	334/456(73%)	450		9/456(1%)	1	450	1304892	1305344	5e-34	158 bits(85)	56.6
Uniq1313	CP015010.1	Rickettsia bellii	211/274(77%)	268		12/274(4%)	53	320	1341735	1342002	1e-30	147 bits(79)	59.11
Uniq1317	AP019368.1	Silvanigrellales bacterium	334/448(75%)	444		8/448(1%)	2	445	7263	7706	2e-43	189 bits(102)	56.44
Uniq1324	CP000083.1	Colwellia psychrerythraea	255/336(76%)	335		2/336(0%)	1	335	2427694	2428028	7e-38	171 bits(92)	57.05
Uniq1328	CP061319.1	Polynucleobacter sp.	316/409(77%)	401		16/409(3%)	1	401	1431233	1431633	1e-54	226 bits(122)	54.81
Uniq1342	CP001672.1	Methylotenera mobilis	359/442(81%)	440		4/442(0%)	1	440	1077921	1078360	6e-93	353 bits(191)	57.94
Uniq1349	CP012358.1	Oblitimonas alkaliphila	293/386(76%)	383		6/386(1%)	4	386	758347	758729	1e-44	193 bits(104)	57.49
Uniq135	CP066681.1	Micavibrio aeruginosavorus	334/456(73%)	450		9/456(1%)	1	450	1304892	1305344	5e-34	158 bits(85)	56.82
Uniq136	CP066681.1	Micavibrio aeruginosavorus	333/456(73%)	450		9/456(1%)	1	450	1304892	1305344	2e-32	152 bits(82)	56.38
Uniq1365	CP061319.1	Polynucleobacter sp.	294/385(76%)	377		16/385(4%)	4	380	1431254	1431630	1e-44	193 bits(104)	54.59
Uniq1375	CP073339.1	Prevotella denticola	59/70(84%)	69		1/70(1%)	169	237	2583215	2583284	9e-07	67.6 bits(36)	56.6
Uniq1379	CP073339.1	Prevotella denticola	59/70(84%)	69		1/70(1%)	169	237	2583215	2583284	9e-07	67.6 bits(36)	56.6
Uniq1387	CP073339.1	Prevotella denticola	59/70(84%)	69		1/70(1%)	169	237	2583215	2583284	9e-07	67.6 bits(36)	56.38
Uniq1395	CP033953.1	Methylomonas clara	328/399(82%)	398		2/399(0%)	1	398	2300711	2301108	1e-89	342 bits(185)	57.05
Uniq1408	CP046822.1	Vibrio metschnikovii	309/418(74%)	412		13/418(3%)	1	412	1537273	1537683	2e-33	156 bits(84)	59.28
Uniq141	CP066681.1	Micavibrio aeruginosavorus	333/456(73%)	450		9/456(1%)	1	450	1304892	1305344	2e-32	152 bits(82)	56.38
Uniq1415	CP061319.1	Polynucleobacter sp.	287/379(76%)	374		10/379(2%)	7	380	1431254	1431627	3e-41	182 bits(98)	55.93
Uniq143	CP073759.1	Methylophilaceae bacterium	359/445(81%)	441		5/445(1%)	10	450	115031	115474	5e-89	340 bits(184)	57.94
Uniq1439	CP061319.1	Polynucleobacter sp.	296/388(76%)	380		16/388(4%)	1	380	1431254	1431633	1e-44	193 bits(104)	54.36
Uniq144	CP066681.1	Micavibrio aeruginosavorus	336/460(73%)	450		17/460(3%)	1	450	1304892	1305344	1e-30	147 bits(79)	56.82
Uniq1440	CP073339.1	Prevotella denticola	59/70(84%)	69		1/70(1%)	169	237	2583215	2583284	9e-07	67.6 bits(36)	56.38
Uniq1442	LN794158.1	Candidatus Methylopumilus turicensis	351/442(79%)	441		2/442(0%)	1	441	736097	736537	4e-80	311 bits(168)	55.26
Uniq1457	CP073339.1	Prevotella denticola	59/70(84%)	69		1/70(1%)	169	237	2583215	2583284	9e-07	67.6 bits(36)	56.6
Uniq147	CP001672.1	Methylotenera mobilis	364/442(82%)	440		4/442(0%)	1	440	1077921	1078360	3e-101	381 bits(206)	58.17
Uniq1497	LR828264.1	Xanthomonas hortorum pv. taraxaci	55/63(87%)	63		0/63(0%)	169	231	3036176	3036238	2e-08	73.1 bits(39)	54.44
Uniq1499	CP050253.1	Orbus sp.	30/30(100%)	30		0/30(0%)	1	30	2599403	2599432	0.002	56.5 bits(30)	59.18
Uniq1505	LR828264.1	Xanthomonas hortorum pv. taraxaci	55/63(87%)	63		0/63(0%)	169	231	3036176	3036238	2e-08	73.1 bits(39)	54.67
Uniq152	CP066681.1	Micavibrio aeruginosavorus	333/456(73%)	450		9/456(1%)	1	450	1304892	1305344	2e-32	152 bits(82)	56.6
Uniq1525	CP002961.1	Emticicia oligotrophica	28/28(100%)	28		0/28(0%)	70	97	4681309	4681336	0.026	52.8 bits(28)	58.96
Uniq1545	CP069587.1	Chromobacterium violaceum	300/397(76%)	393		8/397(2%)	1	393	3745244	3745636	2e-43	189 bits(102)	58.17
Uniq1547	LR828264.1	Xanthomonas hortorum pv. taraxaci	55/63(87%)	63		0/63(0%)	169	231	3036176	3036238	2e-08	73.1 bits(39)	54.44
Uniq1549	CP061319.1	Polynucleobacter sp.	284/376(76%)	371		10/376(2%)	10	380	1431254	1431624	1e-39	176 bits(95)	55.7
Uniq156	CP001672.1	Methylotenera mobilis	363/442(82%)	440		4/442(0%)	1	440	1077921	1078360	1e-99	375 bits(203)	58.39
Uniq1564	CP073759.1	Methylophilaceae bacterium	349/435(80%)	431		5/435(1%)	10	440	115041	115474	2e-83	322 bits(174)	57.27
Uniq1567	LR828264.1	Xanthomonas hortorum pv. taraxaci	55/63(87%)	63		0/63(0%)	169	231	3036176	3036238	2e-08	73.1 bits(39)	54.67
Uniq158	CP066681.1	Micavibrio aeruginosavorus	332/456(73%)	450		9/456(1%)	1	450	1304892	1305344	1e-30	147 bits(79)	56.38
Uniq159	CP073759.1	Methylophilaceae bacterium	366/454(81%)	450		5/454(1%)	1	450	115031	115483	1e-90	346 bits(187)	57.94
Uniq1590	CP015010.1	Rickettsia bellii	211/274(77%)	268		12/274(4%)	53	320	1341735	1342002	1e-30	147 bits(79)	58.89
Uniq1596	CP000083.1	Colwellia psychrerythraea	255/336(76%)	335		2/336(0%)	1	335	2427694	2428028	7e-38	171 bits(92)	57.27
Uniq1599	CP015010.1	Rickettsia bellii	211/274(77%)	268		12/274(4%)	53	320	1341735	1342002	1e-30	147 bits(79)	59.11
Uniq1603	CP002252.1	Methylovorus sp.	316/394(80%)	392		4/394(1%)	10	401	1645386	1645777	1e-74	292 bits(158)	57.27
Uniq1606	CP049634.1	Polynucleobacter paneuropaeus	334/453(74%)	444		18/453(3%)	7	450	1306592	1307035	4e-35	161 bits(87)	55.7
Uniq1632	CP033953.1	Methylomonas clara	328/399(82%)	398		2/399(0%)	1	398	2300711	2301108	1e-89	342 bits(185)	57.49
Uniq164	CP066681.1	Micavibrio aeruginosavorus	333/456(73%)	450		9/456(1%)	1	450	1304892	1305344	2e-32	152 bits(82)	56.6
Uniq165	CP073759.1	Methylophilaceae bacterium	362/448(81%)	444		5/448(1%)	7	450	115031	115477	1e-90	346 bits(187)	57.72
Uniq1655	AP013066.1	Sulfuricella denitrificans	291/381(76%)	380		2/381(0%)	1	380	1029981	1030360	7e-48	204 bits(110)	56.6
Uniq166	CP073759.1	Methylophilaceae bacterium	366/454(81%)	450		5/454(1%)	1	450	115031	115483	1e-90	346 bits(187)	58.17
Uniq1680	CP002961.1	Emticicia oligotrophica	28/28(100%)	28		0/28(0%)	70	97	4681309	4681336	0.026	52.8 bits(28)	58.73
Uniq1683	CP046822.1	Vibrio metschnikovii	309/418(74%)	412		13/418(3%)	1	412	1537273	1537683	2e-33	156 bits(84)	59.51
Uniq1691													59.18
Uniq170	CP073759.1	Methylophilaceae bacterium	364/451(81%)	447		5/451(1%)	4	450	115031	115480	1e-90	346 bits(187)	57.72
Uniq1711	LR828264.1	Xanthomonas hortorum pv. taraxaci	55/63(87%)	63		0/63(0%)	169	231	3036176	3036238	2e-08	73.1 bits(39)	54.44
Uniq1715	CP061319.1	Polynucleobacter sp.	313/406(77%)	398		16/406(3%)	4	401	1431233	1431630	7e-53	220 bits(119)	55.03
Uniq1719	AP019368.1	Silvanigrellales bacterium	331/446(74%)	442		8/446(1%)	4	445	7265	7706	1e-40	180 bits(97)	56.89
Uniq1723	CP012358.1	Oblitimonas alkaliphila	293/386(76%)	383		6/386(1%)	4	386	758347	758729	1e-44	193 bits(104)	57.27
Uniq1725	CP061319.1	Polynucleobacter sp.	315/409(77%)	401		16/409(3%)	1	401	1431233	1431633	7e-53	220 bits(119)	55.03
Uniq173	CP043320.1	Pseudomonas sp.	278/378(74%)	373		10/378(2%)	1	373	1233731	1234103	2e-27	135 bits(73)	56.38
Uniq174	CP001672.1	Methylotenera mobilis	363/442(82%)	440		4/442(0%)	1	440	1077921	1078360	1e-99	375 bits(203)	57.94
Uniq175	CP066681.1	Micavibrio aeruginosavorus	333/456(73%)	450		9/456(1%)	1	450	1304892	1305344	2e-32	152 bits(82)	56.38
Uniq1750	CP002961.1	Emticicia oligotrophica	28/28(100%)	28		0/28(0%)	70	97	4681309	4681336	0.026	52.8 bits(28)	58.5
Uniq1757	CP015010.1	Rickettsia bellii	211/274(77%)	268		12/274(4%)	53	320	1341735	1342002	1e-30	147 bits(79)	58.89
Uniq1760	CP073339.1	Prevotella denticola	59/70(84%)	69		1/70(1%)	169	237	2583215	2583284	9e-07	67.6 bits(36)	56.82
Uniq1781	CP002961.1	Emticicia oligotrophica	28/28(100%)	28		0/28(0%)	70	97	4681309	4681336	0.026	52.8 bits(28)	58.73
Uniq179	CP073759.1	Methylophilaceae bacterium	367/454(81%)	450		5/454(1%)	1	450	115031	115483	2e-92	351 bits(190)	58.17
Uniq1790	CP001672.1	Methylotenera mobilis	360/442(81%)	440		4/442(0%)	1	440	1077921	1078360	1e-94	359 bits(194)	57.72
Uniq1792	LN794158.1	Candidatus Methylopumilus turicensis	362/452(80%)	450		4/452(0%)	1	450	736097	736546	8e-87	333 bits(180)	56.15
Uniq1835	CP071604.1	Rhizobium binae	440/447(98%)	447		0/447(0%)	4	450	1596422	1596868	0	787 bits(426)	53.69
Uniq1838													59.18
Uniq187	CP001672.1	Methylotenera mobilis	362/442(82%)	440		4/442(0%)	1	440	1077921	1078360	6e-98	370 bits(200)	58.17
Uniq1926	CP015010.1	Rickettsia bellii	211/274(77%)	268		12/274(4%)	53	320	1341735	1342002	1e-30	147 bits(79)	59.11
Uniq1935	AP019368.1	Silvanigrellales bacterium	333/448(74%)	444		8/448(1%)	2	445	7263	7706	9e-42	183 bits(99)	56.89
Uniq1936	CP067099.1	Providencia vermicola	172/217(79%)	213		8/217(3%)	1	213	1870358	1870570	4e-30	145 bits(78)	57.72
Uniq1958	LR828264.1	Xanthomonas hortorum pv. taraxaci	55/63(87%)	63		0/63(0%)	169	231	3036176	3036238	2e-08	73.1 bits(39)	54.89
Uniq1966	CP030032.1	Bradymonas sediminis	237/334(71%)	327		14/334(4%)	1	327	5019758	5020084	9e-07	67.6 bits(36)	59.41
Uniq1971	CP002961.1	Emticicia oligotrophica	28/28(100%)	28		0/28(0%)	70	97	4681309	4681336	0.026	52.8 bits(28)	58.73
Uniq1973	CP040971.1	Candidatus Methylopumilus universalis	264/331(80%)	329		4/331(1%)	1	329	589422	589750	7e-58	237 bits(128)	55.93
Uniq1982	CP073339.1	Prevotella denticola	59/70(84%)	69		1/70(1%)	169	237	2583215	2583284	9e-07	67.6 bits(36)	56.6
Uniq1983	CP015010.1	Rickettsia bellii	211/274(77%)	268		12/274(4%)	53	320	1341735	1342002	1e-30	147 bits(79)	59.33
Uniq1997	CP072453.1	Providencia sp.	182/230(79%)	226		7/230(3%)	1	226	1014359	1014585	2e-32	152 bits(82)	57.49
Uniq200	CP073759.1	Methylophilaceae bacterium	359/445(81%)	441		5/445(1%)	10	450	115031	115474	5e-89	340 bits(184)	57.72
Uniq201													59.64
Uniq2011	CP030032.1	Bradymonas sediminis	238/334(71%)	327		14/334(4%)	1	327	5019758	5020084	2e-08	73.1 bits(39)	59.18
Uniq2027	LR828264.1	Xanthomonas hortorum pv. taraxaci	55/63(87%)	63		0/63(0%)	169	231	3036176	3036238	2e-08	73.1 bits(39)	54.89
Uniq2036	CP002961.1	Emticicia oligotrophica	28/28(100%)	28		0/28(0%)	70	97	4681309	4681336	0.026	52.8 bits(28)	58.96
Uniq204	CP073759.1	Methylophilaceae bacterium	352/441(80%)	437		5/441(1%)	4	440	115041	115480	8e-82	316 bits(171)	56.82
Uniq2040													59.18
Uniq2052	LN794158.1	Candidatus Methylopumilus turicensis	361/452(80%)	450		4/452(0%)	1	450	736097	736546	4e-85	327 bits(177)	55.93
Uniq2069	CP000267.1	Rhodoferax ferrireducens	119/158(75%)	157		2/158(1%)	53	209	1700116	1700272	5e-09	75.0 bits(40)	54.22
Uniq2098	CP040947.1	Methylophilus medardicus	382/447(85%)	447		0/447(0%)	4	450	1364698	1365144	8e-127	466 bits(252)	55.48
Uniq2116	CP002961.1	Emticicia oligotrophica	28/28(100%)	28		0/28(0%)	70	97	4681309	4681336	0.026	52.8 bits(28)	58.96
Uniq2138	CP022010.1	Bisgaard Taxon 40	49/51(96%)	51		0/51(0%)	169	219	683832	683882	9e-12	84.2 bits(45)	60.67
Uniq2142	CP061314.1	Polynucleobacter sp.	291/386(75%)	379		14/386(3%)	4	382	1553097	1553475	5e-39	174 bits(94)	55.93
Uniq2143	CP046822.1	Vibrio metschnikovii	309/418(74%)	412		13/418(3%)	1	412	1537273	1537683	2e-33	156 bits(84)	59.28
Uniq217	CP073759.1	Methylophilaceae bacterium	362/448(81%)	444		5/448(1%)	7	450	115031	115477	1e-90	346 bits(187)	57.94
Uniq219	CP073759.1	Methylophilaceae bacterium	355/444(80%)	440		5/444(1%)	1	440	115041	115483	2e-83	322 bits(174)	57.05
Uniq2193	CP002961.1	Emticicia oligotrophica	28/28(100%)	28		0/28(0%)	70	97	4681309	4681336	0.026	52.8 bits(28)	58.96
Uniq2199	CP002961.1	Emticicia oligotrophica	28/28(100%)	28		0/28(0%)	70	97	4681309	4681336	0.026	52.8 bits(28)	59.18
Uniq221	CP066681.1	Micavibrio aeruginosavorus	332/456(73%)	450		9/456(1%)	1	450	1304892	1305344	1e-30	147 bits(79)	56.82
Uniq2213	CP061314.1	Polynucleobacter sp.	293/389(75%)	382		14/389(3%)	1	382	1553097	1553478	5e-39	174 bits(94)	55.7
Uniq2218	AP019368.1	Silvanigrellales bacterium	331/446(74%)	442		8/446(1%)	4	445	7265	7706	1e-40	180 bits(97)	56.89
Uniq2227	CP012358.1	Oblitimonas alkaliphila	290/383(76%)	380		6/383(1%)	7	386	758347	758726	7e-43	187 bits(101)	57.49
Uniq223	CP066681.1	Micavibrio aeruginosavorus	332/456(73%)	450		9/456(1%)	1	450	1304892	1305344	1e-30	147 bits(79)	56.6
Uniq2234	LR828264.1	Xanthomonas hortorum pv. taraxaci	55/63(87%)	63		0/63(0%)	169	231	3036176	3036238	2e-08	73.1 bits(39)	54.67
Uniq2237	CP033953.1	Methylomonas clara	338/420(80%)	419		2/420(0%)	1	419	2300711	2301129	6e-83	320 bits(173)	57.27
Uniq225	CP066681.1	Micavibrio aeruginosavorus	336/460(73%)	450		17/460(3%)	1	450	1304892	1305344	1e-30	147 bits(79)	57.05
Uniq2250	CP020873.1	Prosthecochloris sp.	61/75(81%)	73		4/75(5%)	2	74	116299	116371	0.0006	58.4 bits(31)	59.64
Uniq226	CP073759.1	Methylophilaceae bacterium	359/445(81%)	441		5/445(1%)	10	450	115031	115474	5e-89	340 bits(184)	57.72
Uniq2261	CP042453.1	Arenimonas daejeonensis	383/448(85%)	446		4/448(0%)	1	446	1955304	1955749	3e-126	464 bits(251)	60.18
Uniq2268	CP025429.1	Chromobacterium sp.	384/451(85%)	450		2/451(0%)	1	450	2074102	2074551	4e-125	460 bits(249)	57.72
Uniq2269	LR828264.1	Xanthomonas hortorum pv. taraxaci	55/63(87%)	63		0/63(0%)	169	231	3036176	3036238	2e-08	73.1 bits(39)	54.67
Uniq227	CP073759.1	Methylophilaceae bacterium	359/445(81%)	441		5/445(1%)	10	450	115031	115474	5e-89	340 bits(184)	57.94
Uniq2271	CP042453.1	Arenimonas daejeonensis	383/448(85%)	446		4/448(0%)	1	446	1955304	1955749	3e-126	464 bits(251)	60.4
Uniq2272	CP022010.1	Bisgaard Taxon 40	49/51(96%)	51		0/51(0%)	169	219	683832	683882	9e-12	84.2 bits(45)	60.44
Uniq2291	CP002252.1	Methylovorus sp.	316/394(80%)	392		4/394(1%)	10	401	1645386	1645777	1e-74	292 bits(158)	57.72
Uniq2312	CP066681.1	Micavibrio aeruginosavorus	332/456(73%)	450		9/456(1%)	1	450	1304892	1305344	1e-30	147 bits(79)	56.38
Uniq2316	CP025429.1	Chromobacterium sp.	383/451(85%)	450		2/451(0%)	1	450	2074102	2074551	2e-123	455 bits(246)	57.49
Uniq232	CP061298.1	Polynucleobacter asymbioticus	172/219(79%)	216		6/219(2%)	7	222	1249741	1249956	2e-28	139 bits(75)	57.05
Uniq2338	CP071604.1	Rhizobium binae	441/447(99%)	447		0/447(0%)	4	450	1596422	1596868	0	793 bits(429)	53.47
Uniq2339	CP002961.1	Emticicia oligotrophica	28/28(100%)	28		0/28(0%)	70	97	4681309	4681336	0.026	52.8 bits(28)	58.73
Uniq2346	CP061319.1	Polynucleobacter sp.	300/388(77%)	380		16/388(4%)	1	380	1431254	1431633	3e-51	215 bits(116)	54.59
Uniq2348	CP071604.1	Rhizobium binae	440/447(98%)	447		0/447(0%)	4	450	1596422	1596868	0	787 bits(426)	53.47
Uniq2349	CP033953.1	Methylomonas clara	339/420(81%)	419		2/420(0%)	1	419	2300711	2301129	1e-84	326 bits(176)	57.49
Uniq235	CP066681.1	Micavibrio aeruginosavorus	333/456(73%)	450		9/456(1%)	1	450	1304892	1305344	2e-32	152 bits(82)	56.38
Uniq2354	CP072453.1	Providencia sp.	182/230(79%)	226		7/230(3%)	1	226	1014359	1014585	2e-32	152 bits(82)	57.72
Uniq2361	CP046822.1	Vibrio metschnikovii	310/418(74%)	412		13/418(3%)	1	412	1537273	1537683	4e-35	161 bits(87)	59.28
Uniq2363	CP061319.1	Polynucleobacter sp.	296/388(76%)	380		16/388(4%)	1	380	1431254	1431633	1e-44	193 bits(104)	54.36
Uniq2369	CP016775.1	Candidatus Planktophila versatilis	158/215(73%)	212		6/215(2%)	1	212	1296054	1296265	2e-09	76.8 bits(41)	59.78
Uniq2375	CP047165.1	Pelistega ratti	324/448(72%)	443		10/448(2%)	7	449	969921	970363	3e-26	132 bits(71)	57.94
Uniq238	CP073759.1	Methylophilaceae bacterium	362/448(81%)	444		5/448(1%)	7	450	115031	115477	1e-90	346 bits(187)	57.72
Uniq2382	AP024110.1	Methylophilaceae bacterium	325/404(80%)	402		4/404(0%)	1	402	1244561	1244962	2e-78	305 bits(165)	58.39
Uniq2385	CP071604.1	Rhizobium binae	440/447(98%)	402		0/447(0%)	4	405	1596422	1596868	0	787 bits(426)	53.47
Uniq239	CP073759.1	Methylophilaceae bacterium	367/454(81%)	450		5/454(1%)	1	450	115031	115483	2e-92	351 bits(190)	57.94
Uniq2403	CP002961.1	Emticicia oligotrophica	28/28(100%)	28		0/28(0%)	70	97	4681309	4681336	0.026	52.8 bits(28)	58.73
Uniq242	CP073759.1	Methylophilaceae bacterium	359/445(81%)	441		5/445(1%)	10	450	115031	115474	5e-89	340 bits(184)	57.94
Uniq2427	CP073339.1	Prevotella denticola	59/70(84%)	69		1/70(1%)	169	237	2583215	2583284	9e-07	67.6 bits(36)	56.6
Uniq2434	CP002961.1	Emticicia oligotrophica	28/28(100%)	28		0/28(0%)	70	97	4681309	4681336	0.026	52.8 bits(28)	58.73
Uniq2443	CP013145.1	Colwellia sp.	278/367(76%)	360		14/367(3%)	7	366	2230498	2230857	2e-38	172 bits(93)	59.28
Uniq2464	CP002056.1	Methylotenera versatilis	377/443(85%)	441		4/443(0%)	1	441	1319086	1319526	8e-122	449 bits(243)	57.72
Uniq2474	CP022010.1	Bisgaard Taxon 40	49/51(96%)	51		0/51(0%)	169	219	683832	683882	9e-12	84.2 bits(45)	60.67
Uniq248	CP073759.1	Methylophilaceae bacterium	366/454(81%)	450		5/454(1%)	1	450	115031	115483	1e-90	346 bits(187)	57.94
Uniq249													59.41
Uniq2494	CP071604.1	Rhizobium binae	441/447(99%)	447		0/447(0%)	4	450	1596422	1596868	0	793 bits(429)	53.69
Uniq2502	CP033953.1	Methylomonas clara	322/399(81%)	398		2/399(0%)	1	398	2300711	2301108	1e-79	309 bits(167)	57.05
Uniq251	CP066681.1	Micavibrio aeruginosavorus	332/456(73%)	450		9/456(1%)	1	450	1304892	1305344	1e-30	147 bits(79)	56.82
Uniq254	CP073759.1	Methylophilaceae bacterium	366/454(81%)	450		5/454(1%)	1	450	115031	115483	1e-90	346 bits(187)	58.17
Uniq2560	CP002961.1	Emticicia oligotrophica	28/28(100%)	28		0/28(0%)	70	97	4681309	4681336	0.026	52.8 bits(28)	58.73
Uniq2562	CP002961.1	Emticicia oligotrophica	28/28(100%)	28		0/28(0%)	70	97	4681309	4681336	0.026	52.8 bits(28)	58.96
Uniq2566	CP061319.1	Polynucleobacter sp.	308/400(77%)	392		16/400(4%)	10	401	1431233	1431624	3e-51	215 bits(116)	55.03
Uniq2579													54.59
Uniq258	CP066681.1	Micavibrio aeruginosavorus	332/456(73%)	450		9/456(1%)	1	450	1304892	1305344	1e-30	147 bits(79)	56.6
Uniq259	CP066681.1	Micavibrio aeruginosavorus	333/456(73%)	450		9/456(1%)	1	450	1304892	1305344	2e-32	152 bits(82)	56.38
Uniq260	CP066681.1	Micavibrio aeruginosavorus	336/460(73%)	450		17/460(3%)	1	450	1304892	1305344	1e-30	147 bits(79)	56.82
Uniq262	CP001672.1	Methylotenera mobilis	363/442(82%)	440		4/442(0%)	1	440	1077921	1078360	1e-99	375 bits(203)	57.94
Uniq264	CP066681.1	Micavibrio aeruginosavorus	333/456(73%)	450		9/456(1%)	1	450	1304892	1305344	2e-32	152 bits(82)	56.6
Uniq2650	CP061319.1	Polynucleobacter sp.	295/385(77%)	377		16/385(4%)	4	380	1431254	1431630	3e-46	198 bits(107)	54.36
Uniq267	CP066681.1	Micavibrio aeruginosavorus	334/456(73%)	450		9/456(1%)	1	450	1304892	1305344	5e-34	158 bits(85)	56.6
Uniq2672													59.18
Uniq2687	CP076060.1	Cupriavidus sp.	253/331(76%)	328		6/331(1%)	1	328	763145	763472	5e-39	174 bits(94)	55.7
Uniq269	CP001672.1	Methylotenera mobilis	362/442(82%)	440		4/442(0%)	1	440	1077921	1078360	6e-98	370 bits(200)	58.17
Uniq2702	CP073759.1	Methylophilaceae bacterium	362/451(80%)	447		5/451(1%)	4	450	115031	115480	2e-87	335 bits(181)	58.84
Uniq2729	CP072874.1	Phascolarctobacterium sp.	85/110(77%)	110		0/110(0%)	2	111	929419	929528	3e-06	65.8 bits(35)	58.73
Uniq273	CP066681.1	Micavibrio aeruginosavorus	333/456(73%)	450		9/456(1%)	1	450	1304892	1305344	2e-32	152 bits(82)	56.82
Uniq2744													59.18
Uniq2747													59.64
Uniq275	CP066681.1	Micavibrio aeruginosavorus	332/456(73%)	450		9/456(1%)	1	450	1304892	1305344	1e-30	147 bits(79)	56.6
Uniq276	CP066681.1	Micavibrio aeruginosavorus	332/456(73%)	450		9/456(1%)	1	450	1304892	1305344	1e-30	147 bits(79)	56.38
Uniq2769	CP015010.1	Rickettsia bellii	211/274(77%)	268		12/274(4%)	53	320	1341735	1342002	1e-30	147 bits(79)	58.89
Uniq279	CP066681.1	Micavibrio aeruginosavorus	332/456(73%)	450		9/456(1%)	1	450	1304892	1305344	1e-30	147 bits(79)	56.6
Uniq280	CP043320.1	Pseudomonas sp.	278/378(74%)	373		10/378(2%)	1	373	1233731	1234103	2e-27	135 bits(73)	56.6
Uniq2819	CP002252.1	Methylovorus sp.	316/394(80%)	392		4/394(1%)	10	401	1645386	1645777	1e-74	292 bits(158)	56.6
Uniq282	CP066681.1	Micavibrio aeruginosavorus	332/456(73%)	450		9/456(1%)	1	450	1304892	1305344	1e-30	147 bits(79)	56.38
Uniq283													59.41
Uniq284	CP066681.1	Micavibrio aeruginosavorus	332/456(73%)	450		9/456(1%)	1	450	1304892	1305344	1e-30	147 bits(79)	56.82
Uniq2842													59.41
Uniq287	CP073759.1	Methylophilaceae bacterium	352/441(80%)	437		5/441(1%)	4	440	115041	115480	8e-82	316 bits(171)	56.82
Uniq2878	CP002961.1	Emticicia oligotrophica	28/28(100%)	28		0/28(0%)	70	97	4681309	4681336	0.026	52.8 bits(28)	59.18
Uniq288	CP066681.1	Micavibrio aeruginosavorus	332/456(73%)	450		9/456(1%)	1	450	1304892	1305344	1e-30	147 bits(79)	56.38
Uniq2911	CP003280.1	Aequorivita sublithincola	66/76(87%)	76		0/76(0%)	147	222	3058098	3058173	3e-12	86.1 bits(46)	56.44
Uniq2955	CP064988.1	Rhodospirillales bacterium	204/265(77%)	262		6/265(2%)	73	334	603008	603269	1e-30	147 bits(79)	52.13
Uniq2967	CP071604.1	Rhizobium binae	440/447(98%)	447		0/447(0%)	4	450	1596422	1596868	0	787 bits(426)	53.47
Uniq297													59.86
Uniq298	CP073759.1	Methylophilaceae bacterium	371/454(82%)	450		5/454(1%)	1	450	115031	115483	5e-99	374 bits(202)	58.17
Uniq3011	CP061319.1	Polynucleobacter sp.	308/400(77%)	392		16/400(4%)	10	401	1431233	1431624	3e-51	215 bits(116)	55.26
Uniq3064													59.11
Uniq3069	CP015010.1	Rickettsia bellii	211/274(77%)	268		12/274(4%)	53	320	1341735	1342002	1e-30	147 bits(79)	58.89
Uniq308	CP073759.1	Methylophilaceae bacterium	353/441(80%)	437		5/441(1%)	4	440	115041	115480	2e-83	322 bits(174)	56.82
Uniq3089	CP076060.1	Cupriavidus sp.	253/331(76%)	328		6/331(1%)	1	328	763145	763472	5e-39	174 bits(94)	55.7
Uniq309	CP066681.1	Micavibrio aeruginosavorus	336/460(73%)	450		17/460(3%)	1	450	1304892	1305344	1e-30	147 bits(79)	56.82
Uniq3094	AP024110.1	Methylophilaceae bacterium	325/404(80%)	402		4/404(0%)	1	402	1244561	1244962	2e-78	305 bits(165)	58.17
Uniq3095	CP002961.1	Emticicia oligotrophica	28/28(100%)	28		0/28(0%)	70	97	4681309	4681336	0.026	52.8 bits(28)	58.73
Uniq3110	CP061314.1	Polynucleobacter sp.	293/389(75%)	382		14/389(3%)	1	382	1553097	1553478	5e-39	174 bits(94)	55.7
Uniq3125	CP063311.1	Anabaenopsis elenkinii	48/51(94%)	51		0/51(0%)	169	219	3329490	3329540	4e-10	78.7 bits(42)	61.33
Uniq3130	CP002961.1	Emticicia oligotrophica	28/28(100%)	28		0/28(0%)	70	97	4681309	4681336	0.026	52.8 bits(28)	58.5
Uniq315	CP058348.1	Bdellovibrio sp.	82/92(89%)	91		1/92(1%)	139	229	6917	7008	1e-20	113 bits(61)	56.6
Uniq3152	CP046822.1	Vibrio metschnikovii	310/418(74%)	412		13/418(3%)	1	412	1537273	1537683	4e-35	161 bits(87)	59.73
Uniq318	CP058348.1	Bdellovibrio sp.	82/92(89%)	91		1/92(1%)	139	229	6917	7008	1e-20	113 bits(61)	56.38
Uniq319	CP066681.1	Micavibrio aeruginosavorus	333/456(73%)	450		9/456(1%)	1	450	1304892	1305344	2e-32	152 bits(82)	57.05
Uniq3195	LN794158.1	Candidatus Methylopumilus turicensis	360/451(80%)	450		2/451(0%)	1	450	736097	736546	4e-85	327 bits(177)	54.59
Uniq320	CP061298.1	Polynucleobacter asymbioticus	169/216(78%)	213		6/216(2%)	10	222	1249741	1249953	9e-27	134 bits(72)	56.6
Uniq321	CP073759.1	Methylophilaceae bacterium	359/445(81%)	441		5/445(1%)	10	450	115031	115474	5e-89	340 bits(184)	57.72
Uniq3213	CP013949.1	Bradyrhizobium sp.	286/381(75%)	375		12/381(3%)	10	384	4324619	4324993	9e-37	167 bits(90)	60.22
Uniq3223	CP013949.1	Bradyrhizobium sp.	286/381(75%)	375		12/381(3%)	10	384	4324619	4324993	9e-37	167 bits(90)	60
Uniq3225	CP064988.1	Rhodospirillales bacterium	204/265(77%)	262		6/265(2%)	73	334	603008	603269	1e-30	147 bits(79)	52.35
Uniq3252	CP036536.1	Salinimonas lutimaris	158/218(72%)	215		6/218(2%)	1	215	1993260	1993474	3e-06	65.8 bits(35)	58.96
Uniq329	CP073759.1	Methylophilaceae bacterium	362/448(81%)	444		5/448(1%)	7	450	115031	115477	1e-90	346 bits(187)	57.94
Uniq330	CP001672.1	Methylotenera mobilis	359/442(81%)	440		4/442(0%)	1	440	1077921	1078360	6e-93	353 bits(191)	57.05
Uniq3308	CP073339.1	Prevotella denticola	59/70(84%)	69		1/70(1%)	169	237	2583215	2583284	9e-07	67.6 bits(36)	56.6
Uniq331	CP066681.1	Micavibrio aeruginosavorus	332/456(73%)	450		9/456(1%)	1	450	1304892	1305344	1e-30	147 bits(79)	56.6
Uniq3312	CP042453.1	Arenimonas daejeonensis	383/448(85%)	446		4/448(0%)	1	446	1955304	1955749	3e-126	464 bits(251)	60.4
Uniq3318	CP013949.1	Bradyrhizobium sp.	286/381(75%)	375		12/381(3%)	10	384	4324619	4324993	9e-37	167 bits(90)	60
Uniq334	CP001672.1	Methylotenera mobilis	360/442(81%)	440		4/442(0%)	1	440	1077921	1078360	1e-94	359 bits(194)	57.27
Uniq3344	CP064988.1	Rhodospirillales bacterium	204/265(77%)	262		6/265(2%)	73	334	603008	603269	1e-30	147 bits(79)	52.13
Uniq3348													58.96
Uniq3352	CP025781.1	Iodobacter fluviatilis	188/251(75%)	250		2/251(0%)	61	310	3726168	3726417	1e-20	113 bits(61)	61.71
Uniq3374	CP002961.1	Emticicia oligotrophica	28/28(100%)	28		0/28(0%)	70	97	4681309	4681336	0.026	52.8 bits(28)	59.18
Uniq339	CP058348.1	Bdellovibrio sp.	82/92(89%)	91		1/92(1%)	139	229	6917	7008	1e-20	113 bits(61)	56.82
Uniq341	CP066681.1	Micavibrio aeruginosavorus	332/456(73%)	450		9/456(1%)	1	450	1304892	1305344	1e-30	147 bits(79)	56.38
Uniq3424	LR792838.1	Digitaria exilis	447/450(99%)	450		0/450(0%)	1	450	55031218	55031667	0	815 bits(441)	61.07
Uniq3433	CP040947.1	Methylophilus medardicus	385/450(86%)	450		0/450(0%)	1	450	1364698	1365147	2e-128	472 bits(255)	55.7
Uniq3434	CP061319.1	Polynucleobacter sp.	299/388(77%)	380		16/388(4%)	1	380	1431254	1431633	1e-49	209 bits(113)	54.59
Uniq347	CP066681.1	Micavibrio aeruginosavorus	333/456(73%)	450		9/456(1%)	1	450	1304892	1305344	2e-32	152 bits(82)	56.82
Uniq348	CP073759.1	Methylophilaceae bacterium	356/444(80%)	440		5/444(1%)	1	440	115041	115483	4e-85	327 bits(177)	57.05
Uniq3486	LR828264.1	Xanthomonas hortorum pv. taraxaci	55/63(87%)	63		0/63(0%)	169	231	3036176	3036238	2e-08	73.1 bits(39)	55.11
Uniq350													59.64
Uniq351	CP058348.1	Bdellovibrio sp.	82/92(89%)	91		1/92(1%)	139	229	6917	7008	1e-20	113 bits(61)	56.6
Uniq352	CP040971.1	Candidatus Methylopumilus universalis	298/382(78%)	380		4/382(1%)	1	380	589422	589801	7e-58	237 bits(128)	55.7
Uniq3526	CP073759.1	Methylophilaceae bacterium	367/454(81%)	450		5/454(1%)	1	450	115031	115483	2e-92	351 bits(190)	57.94
Uniq3538	CP061319.1	Polynucleobacter sp.	289/379(76%)	371		16/379(4%)	10	380	1431254	1431624	7e-43	187 bits(101)	54.36
Uniq355													59.41
Uniq3593	LR792838.1	Digitaria exilis	447/450(99%)	450		0/450(0%)	1	450	55031218	55031667	0	815 bits(441)	61.3
Uniq3603	CP002961.1	Emticicia oligotrophica	28/28(100%)	28		0/28(0%)	70	97	4681309	4681336	0.026	52.8 bits(28)	58.73
Uniq3617	CP003280.1	Aequorivita sublithincola	66/76(87%)	76		0/76(0%)	147	222	3058098	3058173	3e-12	86.1 bits(46)	56.89
Uniq3647	CP002961.1	Emticicia oligotrophica	28/28(100%)	28		0/28(0%)	70	97	4681309	4681336	0.026	52.8 bits(28)	59.18
Uniq366	CP043320.1	Pseudomonas sp.	279/378(74%)	373		10/378(2%)	1	373	1233731	1234103	5e-29	141 bits(76)	56.38
Uniq367													59.64
Uniq3673	CP025781.1	Iodobacter fluviatilis	188/251(75%)	250		2/251(0%)	61	310	3726168	3726417	1e-20	113 bits(61)	62.16
Uniq369	CP073759.1	Methylophilaceae bacterium	359/445(81%)	441		5/445(1%)	10	450	115031	115474	5e-89	340 bits(184)	57.94
Uniq373													59.64
Uniq3740	CP071604.1	Rhizobium binae	440/447(98%)	447		0/447(0%)	4	450	1596422	1596868	0	787 bits(426)	53.69
Uniq375	CP039452.1	Enterobacter bugandensis	447/450(99%)	450		0/450(0%)	1	450	2864596	2865045	0	815 bits(441)	60.85
Uniq3755	CP061314.1	Polynucleobacter sp.	293/389(75%)	382		14/389(3%)	1	382	1553097	1553478	5e-39	174 bits(94)	55.7
Uniq379	CP066681.1	Micavibrio aeruginosavorus	333/456(73%)	450		9/456(1%)	1	450	1304892	1305344	2e-32	152 bits(82)	56.82
Uniq3821	CP046822.1	Vibrio metschnikovii	311/418(74%)	412		13/418(3%)	1	412	1537273	1537683	9e-37	167 bits(90)	59.51
Uniq383	CP073759.1	Methylophilaceae bacterium	352/441(80%)	437		5/441(1%)	4	440	115041	115480	8e-82	316 bits(171)	56.82
Uniq3851	CP042169.1	Micrococcus sp.	140/180(78%)	179		2/180(1%)	48	226	1427134	1427312	1e-19	110 bits(59)	56.67
Uniq3856	CP002961.1	Emticicia oligotrophica	28/28(100%)	28		0/28(0%)	70	97	4681309	4681336	0.026	52.8 bits(28)	58.73
Uniq3864													59.18
Uniq388	CP066681.1	Micavibrio aeruginosavorus	332/456(73%)	450		9/456(1%)	1	450	1304892	1305344	1e-30	147 bits(79)	56.6
Uniq3884	CP071604.1	Rhizobium binae	442/447(99%)	447		0/447(0%)	4	450	1596422	1596868	0	798 bits(432)	54.14
Uniq390	CP066681.1	Micavibrio aeruginosavorus	332/456(73%)	450		9/456(1%)	1	450	1304892	1305344	1e-30	147 bits(79)	56.6
Uniq391	CP066681.1	Micavibrio aeruginosavorus	332/456(73%)	450		9/456(1%)	1	450	1304892	1305344	1e-30	147 bits(79)	56.6
Uniq3918	CP071604.1	Rhizobium binae	441/447(99%)	447		0/447(0%)	4	450	1596422	1596868	0	793 bits(429)	53.69
Uniq3920	CP042453.1	Arenimonas daejeonensis	384/448(86%)	446		4/448(0%)	1	446	1955304	1955749	6e-128	470 bits(254)	60.18
Uniq393	CP072598.1	Erwinia gerundensis	271/370(73%)	365		10/370(2%)	1	365	1134917	1135281	1e-24	126 bits(68)	56.38
Uniq3937	CP015010.1	Rickettsia bellii	211/274(77%)	268		12/274(4%)	53	320	1341735	1342002	1e-30	147 bits(79)	59.11
Uniq3979	CP019323.1	Companilactobacillus allii	159/210(76%)	208		4/210(1%)	2	209	620087	620294	3e-17	102 bits(55)	59.33
Uniq4009	CP000083.1	Colwellia psychrerythraea	255/336(76%)	335		2/336(0%)	1	335	2427694	2428028	7e-38	171 bits(92)	57.05
Uniq402	CP043320.1	Pseudomonas sp.	279/378(74%)	373		10/378(2%)	1	373	1233731	1234103	5e-29	141 bits(76)	56.38
Uniq4028	CP004029.1	Lawsonia intracellularis	61/66(92%)	64		2/66(3%)	152	215	974927	974992	2e-14	93.5 bits(50)	59.78
Uniq4062	LT906451.1	Legionella lansingensis	348/459(76%)	450		15/459(3%)	1	450	1137239	1137691	2e-52	219 bits(118)	55.93
Uniq408	CP020873.1	Prosthecochloris sp.	29/29(100%)	29		0/29(0%)	2	30	116299	116327	0.007	54.7 bits(29)	59.86
Uniq4087	CP003555.1	Advenella kashmirensis	290/386(75%)	380		12/386(3%)	1	380	1831406	1831785	7e-38	171 bits(92)	55.93
Uniq4152	CP042453.1	Arenimonas daejeonensis	383/448(85%)	446		4/448(0%)	1	446	1955304	1955749	3e-126	464 bits(251)	60.4
Uniq4160	CP061319.1	Polynucleobacter sp.	311/403(77%)	395		16/403(3%)	7	401	1431233	1431627	7e-53	220 bits(119)	55.03
Uniq418	CP073759.1	Methylophilaceae bacterium	355/444(80%)	440		5/444(1%)	1	440	115041	115483	2e-83	322 bits(174)	57.05
Uniq4196													58.96
Uniq4205	CP061319.1	Polynucleobacter sp.	300/388(77%)	380		16/388(4%)	1	380	1431254	1431633	3e-51	215 bits(116)	54.59
Uniq423	CP001672.1	Methylotenera mobilis	369/441(84%)	441		0/441(0%)	1	441	1077921	1078361	8e-112	416 bits(225)	58.39
Uniq4246	CP049886.1	Vagococcus coleopterorum	163/216(75%)	210		12/216(5%)	1	210	437346	437555	4e-15	95.3 bits(51)	57.11
Uniq426													59.41
Uniq428	CP073759.1	Methylophilaceae bacterium	347/435(80%)	431		5/435(1%)	10	440	115041	115474	4e-80	311 bits(168)	56.82
Uniq431	CP072598.1	Erwinia gerundensis	270/370(73%)	365		10/370(2%)	1	365	1134917	1135281	7e-23	121 bits(65)	56.6
Uniq4342	CP002961.1	Emticicia oligotrophica	28/28(100%)	28		0/28(0%)	70	97	4681309	4681336	0.026	52.8 bits(28)	59.18
Uniq4385	CP030104.1	Flagellimonas maritima	73/86(85%)	86		0/86(0%)	136	221	3050532	3050617	7e-13	87.9 bits(47)	58.39
Uniq4389	CP013949.1	Bradyrhizobium sp.	286/381(75%)	375		12/381(3%)	10	384	4324619	4324993	9e-37	167 bits(90)	60.22
Uniq4391	CP025781.1	Iodobacter fluviatilis	188/251(75%)	250		2/251(0%)	61	310	3726168	3726417	1e-20	113 bits(61)	61.71
Uniq446	CP066681.1	Micavibrio aeruginosavorus	336/460(73%)	450		17/460(3%)	1	450	1304892	1305344	1e-30	147 bits(79)	56.82
Uniq4470	CP076020.1	Tenericutes bacterium	180/234(77%)	229		10/234(4%)	1	229	38470	38698	5e-24	124 bits(67)	57.11
Uniq4479	CP042453.1	Arenimonas daejeonensis	384/448(86%)	446		4/448(0%)	1	446	1955304	1955749	6e-128	470 bits(254)	60.63
Uniq448	CP061313.1	Polynucleobacter sp.	336/454(74%)	446		16/454(3%)	4	449	1458591	1459036	7e-38	171 bits(92)	55.7
Uniq4492	AP024110.1	Methylophilaceae bacterium	360/450(80%)	450		0/450(0%)	1	450	1244561	1245010	8e-87	333 bits(180)	55.03
Uniq4509													58.67
Uniq460	CP061298.1	Polynucleobacter asymbioticus	175/222(79%)	219		6/222(2%)	4	222	1249741	1249959	4e-30	145 bits(78)	55.93
Uniq462	CP062976.1	Neisseria sp.	175/220(80%)	218		4/220(1%)	1	218	1563246	1563463	7e-33	154 bits(83)	57.94
Uniq465	CP066681.1	Micavibrio aeruginosavorus	332/456(73%)	450		9/456(1%)	1	450	1304892	1305344	1e-30	147 bits(79)	56.6
Uniq470	CP073759.1	Methylophilaceae bacterium	353/441(80%)	437		5/441(1%)	4	440	115041	115480	2e-83	322 bits(174)	56.82
Uniq472	CP066681.1	Micavibrio aeruginosavorus	332/456(73%)	450		9/456(1%)	1	450	1304892	1305344	1e-30	147 bits(79)	56.38
Uniq476													59.41
Uniq479													59.64
Uniq48	CP073759.1	Methylophilaceae bacterium	364/451(81%)	447		5/451(1%)	4	450	115031	115480	1e-90	346 bits(187)	57.72
Uniq482													59.86
Uniq488	CP066681.1	Micavibrio aeruginosavorus	333/456(73%)	450		9/456(1%)	1	450	1304892	1305344	2e-32	152 bits(82)	56.6
Uniq492	CP073759.1	Methylophilaceae bacterium	347/435(80%)	431		5/435(1%)	10	440	115041	115474	4e-80	311 bits(168)	57.05
Uniq494													59.64
Uniq498													59.41
Uniq499	CP027417.1	Oligella urethralis	72/88(82%)	87		2/88(2%)	1	87	1518034	1518120	2e-08	73.1 bits(39)	59.86
Uniq501													59.64
Uniq510													59.64
Uniq517	CP058348.1	Bdellovibrio sp.	82/92(89%)	91		1/92(1%)	139	229	6917	7008	1e-20	113 bits(61)	56.38
Uniq519	CP001672.1	Methylotenera mobilis	328/408(80%)	407		2/408(0%)	1	407	1077921	1078327	1e-79	309 bits(167)	55.93
Uniq521	CP003863.1	Paraburkholderia phenoliruptrix	291/395(74%)	392		6/395(1%)	10	401	3174852	3175243	3e-31	148 bits(80)	57.49
Uniq525	CP073759.1	Methylophilaceae bacterium	370/454(81%)	450		5/454(1%)	1	450	115031	115483	2e-97	368 bits(199)	58.61
Uniq529													59.64
Uniq530	CP049634.1	Polynucleobacter paneuropaeus	337/456(74%)	447		18/456(3%)	4	450	1306592	1307038	9e-37	167 bits(90)	55.7
Uniq533	CP058348.1	Bdellovibrio sp.	82/92(89%)	91		1/92(1%)	139	229	6917	7008	1e-20	113 bits(61)	56.38
Uniq534	CP061298.1	Polynucleobacter asymbioticus	175/222(79%)	219		6/222(2%)	4	222	1249741	1249959	4e-30	145 bits(78)	55.7
Uniq541	CP073759.1	Methylophilaceae bacterium	355/444(80%)	440		5/444(1%)	1	440	115041	115483	2e-83	322 bits(174)	57.27
Uniq543	CP058348.1	Bdellovibrio sp.	82/92(89%)	91		1/92(1%)	139	229	6917	7008	1e-20	113 bits(61)	56.82
Uniq544	CP043320.1	Pseudomonas sp.	278/378(74%)	373		10/378(2%)	1	373	1233731	1234103	2e-27	135 bits(73)	56.6
Uniq567	CP049634.1	Polynucleobacter paneuropaeus	336/456(74%)	447		18/456(3%)	4	450	1306592	1307038	4e-35	161 bits(87)	55.48
Uniq568													59.41
Uniq569	CP073759.1	Methylophilaceae bacterium	354/444(80%)	440		5/444(1%)	1	440	115041	115483	8e-82	316 bits(171)	57.05
Uniq571	CP001672.1	Methylotenera mobilis	360/442(81%)	440		4/442(0%)	1	440	1077921	1078360	1e-94	359 bits(194)	57.49
Uniq572	CP061313.1	Polynucleobacter sp.	331/448(74%)	440		16/448(3%)	10	449	1458591	1459030	3e-36	165 bits(89)	56.15
Uniq574	CP043320.1	Pseudomonas sp.	278/378(74%)	373		10/378(2%)	1	373	1233731	1234103	2e-27	135 bits(73)	56.82
Uniq579	CP001672.1	Methylotenera mobilis	371/441(84%)	441		0/441(0%)	1	441	1077921	1078361	4e-115	427 bits(231)	58.61
Uniq581	CP061319.1	Polynucleobacter sp.	292/385(76%)	380		10/385(2%)	1	380	1431254	1431633	7e-43	187 bits(101)	55.48
Uniq585													59.64
Uniq587	CP043320.1	Pseudomonas sp.	279/378(74%)	373		10/378(2%)	1	373	1233731	1234103	5e-29	141 bits(76)	56.6
Uniq593	CP072598.1	Erwinia gerundensis	270/370(73%)	365		10/370(2%)	1	365	1134917	1135281	7e-23	121 bits(65)	56.38
Uniq598	CP021973.1	Methylophaga nitratireducenticrescens	172/223(77%)	218		10/223(4%)	2	219	2145173	2145390	7e-23	121 bits(65)	56.82
Uniq601													59.41
Uniq604													59.86
Uniq607	CP061313.1	Polynucleobacter sp.	333/451(74%)	443		16/451(3%)	7	449	1458591	1459033	3e-36	165 bits(89)	56.6
Uniq608	CP041030.1	Francisella sp.	78/89(88%)	89		0/89(0%)	124	212	482919	483007	7e-18	104 bits(56)	59.06
Uniq609	CP058348.1	Bdellovibrio sp.	82/92(89%)	91		1/92(1%)	139	229	6917	7008	1e-20	113 bits(61)	56.38
Uniq614	CP040976.1	Candidatus Methylopumilus universalis	297/382(78%)	380		4/382(1%)	1	380	579130	579509	3e-56	231 bits(125)	55.7
Uniq618	CP058348.1	Bdellovibrio sp.	82/92(89%)	91		1/92(1%)	139	229	6917	7008	1e-20	113 bits(61)	56.6
Uniq632	CP073759.1	Methylophilaceae bacterium	347/435(80%)	431		5/435(1%)	10	440	115041	115474	4e-80	311 bits(168)	56.82
Uniq634	CP002252.1	Methylovorus sp.	316/394(80%)	392		4/394(1%)	10	401	1645386	1645777	1e-74	292 bits(158)	57.72
Uniq636	CP061319.1	Polynucleobacter sp.	289/382(76%)	377		10/382(2%)	4	380	1431254	1431630	3e-41	182 bits(98)	55.7
Uniq64	CP073759.1	Methylophilaceae bacterium	367/454(81%)	450		5/454(1%)	1	450	115031	115483	2e-92	351 bits(190)	57.94
Uniq642													59.86
Uniq646	CP049634.1	Polynucleobacter paneuropaeus	336/455(74%)	447		16/455(3%)	4	450	1306592	1307038	9e-37	167 bits(90)	55.48
Uniq647													59.64
Uniq650	CP073759.1	Methylophilaceae bacterium	363/445(82%)	441		5/445(1%)	10	450	115031	115474	1e-95	363 bits(196)	57.94
Uniq654	CP061298.1	Polynucleobacter asymbioticus	170/216(79%)	213		6/216(2%)	10	222	1249741	1249953	2e-28	139 bits(75)	55.93
Uniq656	CP001672.1	Methylotenera mobilis	369/441(84%)	441		0/441(0%)	1	441	1077921	1078361	8e-112	416 bits(225)	58.84
Uniq662	CP043320.1	Pseudomonas sp.	280/378(74%)	373		10/378(2%)	1	373	1233731	1234103	1e-30	147 bits(79)	56.38
Uniq665	CP058348.1	Bdellovibrio sp.	82/92(89%)	91		1/92(1%)	139	229	6917	7008	1e-20	113 bits(61)	56.6
Uniq679	CP043320.1	Pseudomonas sp.	279/378(74%)	373		10/378(2%)	1	373	1233731	1234103	5e-29	141 bits(76)	56.6
Uniq682													60.09
Uniq695	CP058348.1	Bdellovibrio sp.	82/92(89%)	91		1/92(1%)	139	229	6917	7008	1e-20	113 bits(61)	56.82
Uniq696	CP058348.1	Bdellovibrio sp.	82/92(89%)	91		1/92(1%)	139	229	6917	7008	1e-20	113 bits(61)	56.6
Uniq699													59.64
Uniq703													59.64
Uniq713													59.64
Uniq717	CP033953.1	Methylomonas clara	340/420(81%)	419		2/420(0%)	1	419	2300711	2301129	3e-86	331 bits(179)	57.49
Uniq730													59.86
Uniq731	CP058348.1	Bdellovibrio sp.	82/92(89%)	91		1/92(1%)	139	229	6917	7008	1e-20	113 bits(61)	56.82
Uniq735	AP019368.1	Silvanigrellales bacterium	332/446(74%)	442		8/446(1%)	4	445	7265	7706	2e-42	185 bits(100)	56.44
Uniq737	CP073759.1	Methylophilaceae bacterium	363/445(82%)	441		5/445(1%)	10	450	115031	115474	1e-95	363 bits(196)	58.39
Uniq74	CP066681.1	Micavibrio aeruginosavorus	333/456(73%)	450		9/456(1%)	1	450	1304892	1305344	2e-32	152 bits(82)	56.38
Uniq744	CP058348.1	Bdellovibrio sp.	82/92(89%)	91		1/92(1%)	139	229	6917	7008	1e-20	113 bits(61)	56.38
Uniq746	CP073759.1	Methylophilaceae bacterium	347/435(80%)	431		5/435(1%)	10	440	115041	115474	4e-80	311 bits(168)	57.05
Uniq748	CP061313.1	Polynucleobacter sp.	331/448(74%)	440		16/448(3%)	10	449	1458591	1459030	3e-36	165 bits(89)	55.93
Uniq750	CP058348.1	Bdellovibrio sp.	82/92(89%)	91		1/92(1%)	139	229	6917	7008	1e-20	113 bits(61)	56.6
Uniq759	CP033953.1	Methylomonas clara	339/420(81%)	419		2/420(0%)	1	419	2300711	2301129	1e-84	326 bits(176)	57.27
Uniq76	CP001672.1	Methylotenera mobilis	363/442(82%)	440		4/442(0%)	1	440	1077921	1078360	1e-99	375 bits(203)	58.17
Uniq768													59.64
Uniq770													59.41
Uniq771	LN794158.1	Candidatus Methylopumilus turicensis	360/451(80%)	450		2/451(0%)	1	450	736097	736546	4e-85	327 bits(177)	55.93
Uniq774	CP061298.1	Polynucleobacter asymbioticus	177/225(79%)	222		6/225(2%)	1	222	1249741	1249962	4e-30	145 bits(78)	55.93
Uniq786	CP061298.1	Polynucleobacter asymbioticus	177/225(79%)	222		6/225(2%)	1	222	1249741	1249962	4e-30	145 bits(78)	55.7
Uniq793	CP062976.1	Neisseria sp.	176/220(80%)	218		4/220(1%)	1	218	1563246	1563463	1e-34	159 bits(86)	57.94
Uniq807	CP073759.1	Methylophilaceae bacterium	366/448(82%)	444		5/448(1%)	7	450	115031	115477	2e-97	368 bits(199)	57.94
Uniq827	CP067099.1	Providencia vermicola	173/217(80%)	213		8/217(3%)	1	213	1870358	1870570	9e-32	150 bits(81)	57.49
Uniq836	CP061319.1	Polynucleobacter sp.	293/385(76%)	380		10/385(2%)	1	380	1431254	1431633	1e-44	193 bits(104)	55.48
Uniq839	CP073759.1	Methylophilaceae bacterium	371/454(82%)	450		5/454(1%)	1	450	115031	115483	5e-99	374 bits(202)	58.84
Uniq846	CP061298.1	Polynucleobacter asymbioticus	175/222(79%)	219		6/222(2%)	4	222	1249741	1249959	4e-30	145 bits(78)	56.15
Uniq849	CP058348.1	Bdellovibrio sp.	82/92(89%)	91		1/92(1%)	139	229	6917	7008	1e-20	113 bits(61)	56.6
Uniq861	CP003863.1	Paraburkholderia phenoliruptrix	291/395(74%)	392		6/395(1%)	10	401	3174852	3175243	3e-31	148 bits(80)	57.49
Uniq871	CP058348.1	Bdellovibrio sp.	82/92(89%)	91		1/92(1%)	139	229	6917	7008	1e-20	113 bits(61)	56.6
Uniq873	AP021888.1	Thiosulfativibrio zosterae	164/212(77%)	209		6/212(2%)	2	210	1478952	1479160	7e-23	121 bits(65)	56.6
Uniq88	CP001672.1	Methylotenera mobilis	362/442(82%)	440		4/442(0%)	1	440	1077921	1078360	6e-98	370 bits(200)	57.94
Uniq881	CP058348.1	Bdellovibrio sp.	82/92(89%)	91		1/92(1%)	139	229	6917	7008	1e-20	113 bits(61)	56.6
Uniq887	AP019368.1	Silvanigrellales bacterium	332/446(74%)	442		8/446(1%)	4	445	7265	7706	2e-42	185 bits(100)	56.67
Uniq908	CP049634.1	Polynucleobacter paneuropaeus	330/450(73%)	441		18/450(4%)	10	450	1306592	1307032	9e-32	150 bits(81)	56.38
Uniq911	CP048031.1	Shewanella sp.	59/68(87%)	68		0/68(0%)	145	212	2642590	2642657	2e-09	76.8 bits(41)	60.44
Uniq914	CP073339.1	Prevotella denticola	59/70(84%)	69		1/70(1%)	169	237	2583215	2583284	9e-07	67.6 bits(36)	56.38
Uniq92	CP073759.1	Methylophilaceae bacterium	365/451(81%)	447		5/451(1%)	4	450	115031	115480	2e-92	351 bits(190)	57.72
Uniq939	CP058348.1	Bdellovibrio sp.	82/92(89%)	91		1/92(1%)	139	229	6917	7008	1e-20	113 bits(61)	56.6
Uniq946	CP049634.1	Polynucleobacter paneuropaeus	330/450(73%)	441		18/450(4%)	10	450	1306592	1307032	9e-32	150 bits(81)	56.15
Uniq95	CP073759.1	Methylophilaceae bacterium	368/454(81%)	450		5/454(1%)	1	450	115031	115483	5e-94	357 bits(193)	57.94
Uniq954	CP058348.1	Bdellovibrio sp.	82/92(89%)	91		1/92(1%)	139	229	6917	7008	1e-20	113 bits(61)	56.82
Uniq978	CP002252.1	Methylovorus sp.	316/394(80%)	392		4/394(1%)	10	401	1645386	1645777	1e-74	292 bits(158)	57.27
Uniq994	CP002056.1	Methylotenera versatilis	363/441(82%)	440		2/441(0%)	1	440	1319086	1319525	3e-101	381 bits(206)	56.82

## Sheet: Figure 2F
SQR9-inoculated Fig.2F	Subject id	species	% identity	alignment length	mismatches	gap openings	q. start	q. end	s. start	s. end	e-value	bit score	% identity to SQR9 (Cluster Omega)
Uniq100	CACSIW010000002.1:286203-288701	Bacillus sp.	87.556	450	56	0	1	450	349	798	4.11e-148	521	60.63
Uniq103	CACSIW010000002.1:286203-288701	Bacillus sp.	88	450	54	0	1	450	349	798	1.9e-151	532	60.4
Uniq104	CACSIW010000002.1:286203-288701	Bacillus sp.	87.778	450	55	0	1	450	349	798	8.84e-150	527	60.18
Uniq108	CACSIW010000002.1:286203-288701	Bacillus sp.	87.556	450	56	0	1	450	349	798	4.11e-148	521	60.63
Uniq116	CACSIW010000002.1:286203-288701	Bacillus sp.	87.778	450	55	0	1	450	349	798	8.84e-150	527	60.4
Uniq117	CACSIW010000002.1:286203-288701	Bacillus sp.	87.556	450	56	0	1	450	349	798	4.11e-148	521	60.4
Uniq1191	CACSIW010000002.1:286203-288701	Bacillus sp.	86.889	450	59	0	1	450	349	798	4.14e-143	505	60.4
Uniq1208	CACSIW010000002.1:286203-288701	Bacillus sp.	86.889	450	59	0	1	450	349	798	4.14e-143	505	60.18
Uniq121	CACSIW010000002.1:286203-288701	Bacillus sp.	87.778	450	55	0	1	450	349	798	8.84e-150	527	60.85
Uniq124	CACSIW010000002.1:286203-288701	Bacillus sp.	87.556	450	56	0	1	450	349	798	4.11e-148	521	60.18
Uniq125	CACSIW010000002.1:286203-288701	Bacillus sp.	87.778	450	55	0	1	450	349	798	8.84e-150	527	60.18
Uniq129	CACSIW010000002.1:286203-288701	Bacillus sp.	87.778	450	55	0	1	450	349	798	8.84e-150	527	60.63
Uniq1299	CACSIW010000002.1:286203-288701	Bacillus sp.	86.889	450	59	0	1	450	349	798	4.14e-143	505	60.18
Uniq134	CACSIW010000002.1:286203-288701	Bacillus sp.	87.556	450	56	0	1	450	349	798	4.11e-148	521	60.4
Uniq139	CACSIW010000002.1:286203-288701	Bacillus sp.	87.556	450	56	0	1	450	349	798	4.11e-148	521	60.63
Uniq146	CACSIW010000002.1:286203-288701	Bacillus sp.	87.778	450	55	0	1	450	349	798	8.84e-150	527	60.18
Uniq1507	CACSIW010000002.1:286203-288701	Bacillus sp.	86.889	450	59	0	1	450	349	798	4.14e-143	505	60.18
Uniq1537	CACSIW010000002.1:286203-288701	Bacillus sp.	87.111	450	58	0	1	450	349	798	8.91e-145	510	60.18
Uniq157	CACSIW010000002.1:286203-288701	Bacillus sp.	88	450	54	0	1	450	349	798	1.9e-151	532	60.63
Uniq162	CACSIW010000002.1:286203-288701	Bacillus sp.	87.778	450	55	0	1	450	349	798	8.84e-150	527	60.18
Uniq167	CACSIW010000002.1:286203-288701	Bacillus sp.	87.556	450	56	0	1	450	349	798	4.11e-148	521	60.4
Uniq171	CACSIW010000002.1:286203-288701	Bacillus sp.	87.556	450	56	0	1	450	349	798	4.11e-148	521	60.4
Uniq1724	CACSIW010000002.1:286203-288701	Bacillus sp.	86.889	450	59	0	1	450	349	798	4.14e-143	505	60.4
Uniq186	CACSIW010000002.1:286203-288701	Bacillus sp.	87.778	450	55	0	1	450	349	798	8.84e-150	527	60.4
Uniq1878	CACSIW010000002.1:286203-288701	Bacillus sp.	86.889	450	59	0	1	450	349	798	4.14e-143	505	60.4
Uniq1918	CACSIW010000002.1:286203-288701	Bacillus sp.	86.889	450	59	0	1	450	349	798	4.14e-143	505	60.4
Uniq1919	CACSIW010000002.1:286203-288701	Bacillus sp.	87.111	450	58	0	1	450	349	798	8.91e-145	510	60.4
Uniq196	CACSIW010000002.1:286203-288701	Bacillus sp.	87.778	450	55	0	1	450	349	798	8.84e-150	527	60.4
Uniq199	CACSIW010000002.1:286203-288701	Bacillus sp.	88	450	54	0	1	450	349	798	1.9e-151	532	60.4
Uniq209	CACSIW010000002.1:286203-288701	Bacillus sp.	87.556	450	56	0	1	450	349	798	4.11e-148	521	60.4
Uniq218	CACSIW010000002.1:286203-288701	Bacillus sp.	87.778	450	55	0	1	450	349	798	8.84e-150	527	60.63
Uniq245	CACSIW010000002.1:286203-288701	Bacillus sp.	87.778	450	55	0	1	450	349	798	8.84e-150	527	60.18
Uniq2657	CACSIW010000002.1:286203-288701	Bacillus sp.	87.333	450	57	0	1	450	349	798	1.91e-146	516	59.96
Uniq30	CACSIW010000002.1:286203-288701	Bacillus sp.	87.556	450	56	0	1	450	349	798	4.11e-148	521	60.18
Uniq45	CACSIW010000002.1:286203-288701	Bacillus sp.	87.556	450	56	0	1	450	349	798	4.11e-148	521	60.4
Uniq63	CACSIW010000002.1:286203-288701	Bacillus sp.	87.778	450	55	0	1	450	349	798	8.84e-150	527	60.4
Uniq65	CACSIW010000002.1:286203-288701	Bacillus sp.	87.556	450	56	0	1	450	349	798	4.11e-148	521	60.18
Uniq69	CACSIW010000002.1:286203-288701	Bacillus sp.	87.556	450	56	0	1	450	349	798	4.11e-148	521	60.18
Uniq71	CACSIW010000002.1:286203-288701	Bacillus sp.	87.556	450	56	0	1	450	349	798	4.11e-148	521	60.4
Uniq72	CACSIW010000002.1:286203-288701	Bacillus sp.	87.778	450	55	0	1	450	349	798	8.84e-150	527	60.63
Uniq75	CACSIW010000002.1:286203-288701	Bacillus sp.	87.556	450	56	0	1	450	349	798	4.11e-148	521	60.18
Uniq79	CACSIW010000002.1:286203-288701	Bacillus sp.	87.778	450	55	0	1	450	349	798	8.84e-150	527	60.18
Uniq93	CACSIW010000002.1:286203-288701	Bacillus sp.	87.556	450	56	0	1	450	349	798	4.11e-148	521	60.4
Uniq97	CACSIW010000002.1:286203-288701	Bacillus sp.	87.556	450	56	0	1	450	349	798	4.11e-148	521	60.4
Uniq98	CACSIW010000002.1:286203-288701	Bacillus sp.	87.556	450	56	0	1	450	349	798	4.11e-148	521	60.18
Uniq99	CACSIW010000002.1:286203-288701	Bacillus sp.	87.778	450	55	0	1	450	349	798	8.84e-150	527	60.4
Uniq4216	CP039727.1:6982-9354	Bacillus sp.	80.405	444	85	2	1	443	331	773	1.6e-92	337	70.44
Uniq1008	CP048876.1:6601-9003	Bacillus sp.	99.111	450	4	0	1	450	343	792	0	809	98.89
Uniq1	CP050448.1:7012-9414	Bacillus velezensis	99.111	450	4	0	1	450	343	792	0	809	99.11
Uniq10	CP050448.1:7012-9414	Bacillus velezensis	99.333	450	3	0	1	450	343	792	0	815	99.33
Uniq1001	CP050448.1:7012-9414	Bacillus velezensis	99.111	450	4	0	1	450	343	792	0	809	99.11
Uniq1002	CP050448.1:7012-9414	Bacillus velezensis	99.111	450	4	0	1	450	343	792	0	809	99.11
Uniq1025	CP050448.1:7012-9414	Bacillus velezensis	99.111	450	4	0	1	450	343	792	0	809	99.11
Uniq1035	CP050448.1:7012-9414	Bacillus velezensis	99.111	450	4	0	1	450	343	792	0	809	99.11
Uniq1049	CP050448.1:7012-9414	Bacillus velezensis	98.889	450	5	0	1	450	343	792	0	804	98.89
Uniq1075	CP050448.1:7012-9414	Bacillus velezensis	99.111	450	4	0	1	450	343	792	0	809	99.11
Uniq1093	CP050448.1:7012-9414	Bacillus velezensis	99.333	450	3	0	1	450	343	792	0	815	99.33
Uniq11	CP050448.1:7012-9414	Bacillus velezensis	99.333	450	3	0	1	450	343	792	0	815	99.33
Uniq1118	CP050448.1:7012-9414	Bacillus velezensis	98.889	450	5	0	1	450	343	792	0	804	98.89
Uniq1121	CP050448.1:7012-9414	Bacillus velezensis	98.889	450	5	0	1	450	343	792	0	804	98.89
Uniq1124	CP050448.1:7012-9414	Bacillus velezensis	99.333	450	3	0	1	450	343	792	0	815	99.33
Uniq1176	CP050448.1:7012-9414	Bacillus velezensis	99.111	450	4	0	1	450	343	792	0	809	99.11
Uniq12	CP050448.1:7012-9414	Bacillus velezensis	99.556	450	2	0	1	450	343	792	0	821	99.56
Uniq1234	CP050448.1:7012-9414	Bacillus velezensis	99.556	450	2	0	1	450	343	792	0	821	99.56
Uniq1255	CP050448.1:7012-9414	Bacillus velezensis	99.333	450	3	0	1	450	343	792	0	815	99.33
Uniq1257	CP050448.1:7012-9414	Bacillus velezensis	98.889	450	5	0	1	450	343	792	0	804	98.89
Uniq1277	CP050448.1:7012-9414	Bacillus velezensis	98.889	450	5	0	1	450	343	792	0	804	98.89
Uniq1281	CP050448.1:7012-9414	Bacillus velezensis	99.111	450	4	0	1	450	343	792	0	809	99.11
Uniq1284	CP050448.1:7012-9414	Bacillus velezensis	99.111	450	4	0	1	450	343	792	0	809	99.11
Uniq1289	CP050448.1:7012-9414	Bacillus velezensis	98.889	450	5	0	1	450	343	792	0	804	98.89
Uniq1302	CP050448.1:7012-9414	Bacillus velezensis	98.889	450	5	0	1	450	343	792	0	804	98.89
Uniq1373	CP050448.1:7012-9414	Bacillus velezensis	99.111	450	4	0	1	450	343	792	0	809	99.11
Uniq1382	CP050448.1:7012-9414	Bacillus velezensis	99.111	450	4	0	1	450	343	792	0	809	99.11
Uniq14	CP050448.1:7012-9414	Bacillus velezensis	99.333	450	3	0	1	450	343	792	0	815	99.33
Uniq1410	CP050448.1:7012-9414	Bacillus velezensis	99.333	450	3	0	1	450	343	792	0	815	99.33
Uniq1454	CP050448.1:7012-9414	Bacillus velezensis	99.111	450	4	0	1	450	343	792	0	809	99.11
Uniq1487	CP050448.1:7012-9414	Bacillus velezensis	98.889	450	5	0	1	450	343	792	0	804	98.89
Uniq1490	CP050448.1:7012-9414	Bacillus velezensis	98.889	450	5	0	1	450	343	792	0	804	98.89
Uniq1494	CP050448.1:7012-9414	Bacillus velezensis	99.333	450	3	0	1	450	343	792	0	815	99.33
Uniq1496	CP050448.1:7012-9414	Bacillus velezensis	99.111	450	4	0	1	450	343	792	0	809	99.11
Uniq15	CP050448.1:7012-9414	Bacillus velezensis	99.778	450	1	0	1	450	343	792	0	826	99.78
Uniq1520	CP050448.1:7012-9414	Bacillus velezensis	99.556	450	2	0	1	450	343	792	0	821	99.56
Uniq1559	CP050448.1:7012-9414	Bacillus velezensis	99.111	450	4	0	1	450	343	792	0	809	99.11
Uniq1569	CP050448.1:7012-9414	Bacillus velezensis	99.333	450	3	0	1	450	343	792	0	815	99.33
Uniq16	CP050448.1:7012-9414	Bacillus velezensis	99.333	450	3	0	1	450	343	792	0	815	99.33
Uniq1624	CP050448.1:7012-9414	Bacillus velezensis	99.333	450	3	0	1	450	343	792	0	815	99.33
Uniq1728	CP050448.1:7012-9414	Bacillus velezensis	98.889	450	5	0	1	450	343	792	0	804	98.89
Uniq1753	CP050448.1:7012-9414	Bacillus velezensis	98.889	450	5	0	1	450	343	792	0	804	98.89
Uniq1796	CP050448.1:7012-9414	Bacillus velezensis	98.889	450	5	0	1	450	343	792	0	804	98.89
Uniq18	CP050448.1:7012-9414	Bacillus velezensis	99.556	450	2	0	1	450	343	792	0	821	99.56
Uniq1826	CP050448.1:7012-9414	Bacillus velezensis	99.333	450	3	0	1	450	343	792	0	815	99.33
Uniq1847	CP050448.1:7012-9414	Bacillus velezensis	98.889	450	5	0	1	450	343	792	0	804	98.89
Uniq1863	CP050448.1:7012-9414	Bacillus velezensis	99.111	450	4	0	1	450	343	792	0	809	99.11
Uniq1894	CP050448.1:7012-9414	Bacillus velezensis	99.111	450	4	0	1	450	343	792	0	809	99.11
Uniq1897	CP050448.1:7012-9414	Bacillus velezensis	99.333	450	3	0	1	450	343	792	0	815	99.33
Uniq19	CP050448.1:7012-9414	Bacillus velezensis	99.111	450	4	0	1	450	343	792	0	809	99.11
Uniq1911	CP050448.1:7012-9414	Bacillus velezensis	98.889	450	5	0	1	450	343	792	0	804	98.89
Uniq1942	CP050448.1:7012-9414	Bacillus velezensis	99.333	450	3	0	1	450	343	792	0	815	99.33
Uniq1950	CP050448.1:7012-9414	Bacillus velezensis	98.889	450	5	0	1	450	343	792	0	804	98.89
Uniq2	CP050448.1:7012-9414	Bacillus velezensis	99.556	450	2	0	1	450	343	792	0	821	99.56
Uniq2001	CP050448.1:7012-9414	Bacillus velezensis	99.333	450	3	0	1	450	343	792	0	815	99.33
Uniq2050	CP050448.1:7012-9414	Bacillus velezensis	99.333	450	3	0	1	450	343	792	0	815	99.33
Uniq2099	CP050448.1:7012-9414	Bacillus velezensis	99.111	450	4	0	1	450	343	792	0	809	99.11
Uniq2140	CP050448.1:7012-9414	Bacillus velezensis	99.111	450	4	0	1	450	343	792	0	809	99.11
Uniq2183	CP050448.1:7012-9414	Bacillus velezensis	99.333	450	3	0	1	450	343	792	0	815	99.33
Uniq22	CP050448.1:7012-9414	Bacillus velezensis	99.333	450	3	0	1	450	343	792	0	815	99.33
Uniq2236	CP050448.1:7012-9414	Bacillus velezensis	99.556	450	2	0	1	450	343	792	0	821	99.56
Uniq23	CP050448.1:7012-9414	Bacillus velezensis	99.556	450	2	0	1	450	343	792	0	821	99.56
Uniq24	CP050448.1:7012-9414	Bacillus velezensis	99.111	450	4	0	1	450	343	792	0	809	99.11
Uniq2479	CP050448.1:7012-9414	Bacillus velezensis	99.556	450	2	0	1	450	343	792	0	821	99.56
Uniq25	CP050448.1:7012-9414	Bacillus velezensis	99.111	450	4	0	1	450	343	792	0	809	99.11
Uniq2546	CP050448.1:7012-9414	Bacillus velezensis	99.111	450	4	0	1	450	343	792	0	809	99.11
Uniq2597	CP050448.1:7012-9414	Bacillus velezensis	99.111	450	4	0	1	450	343	792	0	809	99.11
Uniq26	CP050448.1:7012-9414	Bacillus velezensis	100	450	0	0	1	450	343	792	0	832	100
Uniq27	CP050448.1:7012-9414	Bacillus velezensis	99.556	450	2	0	1	450	343	792	0	821	99.56
Uniq2739	CP050448.1:7012-9414	Bacillus velezensis	99.333	450	3	0	1	450	343	792	0	815	99.33
Uniq2767	CP050448.1:7012-9414	Bacillus velezensis	99.111	450	4	0	1	450	343	792	0	809	99.11
Uniq28	CP050448.1:7012-9414	Bacillus velezensis	99.111	450	4	0	1	450	343	792	0	809	99.11
Uniq2804	CP050448.1:7012-9414	Bacillus velezensis	98.889	450	5	0	1	450	343	792	0	804	98.89
Uniq2895	CP050448.1:7012-9414	Bacillus velezensis	99.115	452	1	3	2	450	341	792	0	809	99.11
Uniq29	CP050448.1:7012-9414	Bacillus velezensis	99.333	450	3	0	1	450	343	792	0	815	99.33
Uniq2972	CP050448.1:7012-9414	Bacillus velezensis	99.111	450	4	0	1	450	343	792	0	809	99.11
Uniq3	CP050448.1:7012-9414	Bacillus velezensis	99.333	450	3	0	1	450	343	792	0	815	99.33
Uniq31	CP050448.1:7012-9414	Bacillus velezensis	99.333	450	3	0	1	450	343	792	0	815	99.33
Uniq32	CP050448.1:7012-9414	Bacillus velezensis	99.333	450	3	0	1	450	343	792	0	815	99.33
Uniq3297	CP050448.1:7012-9414	Bacillus velezensis	98.889	450	5	0	1	450	343	792	0	804	98.89
Uniq34	CP050448.1:7012-9414	Bacillus velezensis	99.333	450	3	0	1	450	343	792	0	815	99.33
Uniq3428	CP050448.1:7012-9414	Bacillus velezensis	99.111	450	4	0	1	450	343	792	0	809	99.11
Uniq35	CP050448.1:7012-9414	Bacillus velezensis	99.111	450	4	0	1	450	343	792	0	809	99.11
Uniq38	CP050448.1:7012-9414	Bacillus velezensis	99.111	450	4	0	1	450	343	792	0	809	99.11
Uniq3849	CP050448.1:7012-9414	Bacillus velezensis	98.889	450	5	0	1	450	343	792	0	804	98.89
Uniq4	CP050448.1:7012-9414	Bacillus velezensis	99.333	450	3	0	1	450	343	792	0	815	99.33
Uniq40	CP050448.1:7012-9414	Bacillus velezensis	99.556	450	2	0	1	450	343	792	0	821	99.56
Uniq41	CP050448.1:7012-9414	Bacillus velezensis	99.333	450	3	0	1	450	343	792	0	815	99.33
Uniq43	CP050448.1:7012-9414	Bacillus velezensis	99.333	450	3	0	1	450	343	792	0	815	99.33
Uniq49	CP050448.1:7012-9414	Bacillus velezensis	99.333	450	3	0	1	450	343	792	0	815	99.33
Uniq5	CP050448.1:7012-9414	Bacillus velezensis	99.333	450	3	0	1	450	343	792	0	815	99.33
Uniq6	CP050448.1:7012-9414	Bacillus velezensis	99.111	450	4	0	1	450	343	792	0	809	99.11
Uniq60	CP050448.1:7012-9414	Bacillus velezensis	99.111	450	4	0	1	450	343	792	0	809	99.11
Uniq61	CP050448.1:7012-9414	Bacillus velezensis	99.333	450	3	0	1	450	343	792	0	815	99.33
Uniq617	CP050448.1:7012-9414	Bacillus velezensis	98.889	450	5	0	1	450	343	792	0	804	98.89
Uniq7	CP050448.1:7012-9414	Bacillus velezensis	99.111	450	4	0	1	450	343	792	0	809	99.11
Uniq8	CP050448.1:7012-9414	Bacillus velezensis	99.111	450	4	0	1	450	343	792	0	809	99.11
Uniq896	CP050448.1:7012-9414	Bacillus velezensis	99.111	450	4	0	1	450	343	792	0	809	99.11
Uniq9	CP050448.1:7012-9414	Bacillus velezensis	99.111	450	4	0	1	450	343	792	0	809	99.11
Uniq974	CP050448.1:7012-9414	Bacillus velezensis	99.333	450	3	0	1	450	343	792	0	815	99.33
Uniq102	CP066681.1	Micavibrio aeruginosavorus	333/456(73%)	450		9/456(1%)	1	450	1304892	1305344	2e-32	152 bits(82)	56.6
Uniq105	CP073759.1	Methylophilaceae bacterium	364/451(81%)	447		5/451(1%)	4	450	115031	115480	1e-90	346 bits(187)	57.72
Uniq106	CP073759.1	Methylophilaceae bacterium	364/451(81%)	447		5/451(1%)	4	450	115031	115480	1e-90	346 bits(187)	57.72
Uniq112	CP073759.1	Methylophilaceae bacterium	359/445(81%)	441		5/445(1%)	10	450	115031	115474	5e-89	340 bits(184)	57.72
Uniq118	CP073759.1	Methylophilaceae bacterium	367/454(81%)	450		5/454(1%)	1	450	115031	115483	2e-92	351 bits(190)	57.94
Uniq122													59.41
Uniq123	CP001672.1	Methylotenera mobilis	362/442(82%)	440		4/442(0%)	1	440	1077921	1078360	6e-98	370 bits(200)	57.94
Uniq126	CP073759.1	Methylophilaceae bacterium	365/451(81%)	447		5/451(1%)	4	450	115031	115480	2e-92	351 bits(190)	57.72
Uniq130	CP066681.1	Micavibrio aeruginosavorus	334/456(73%)	450		9/456(1%)	1	450	1304892	1305344	5e-34	158 bits(85)	56.6
Uniq135	CP066681.1	Micavibrio aeruginosavorus	334/456(73%)	450		9/456(1%)	1	450	1304892	1305344	5e-34	158 bits(85)	56.82
Uniq136	CP066681.1	Micavibrio aeruginosavorus	333/456(73%)	450		9/456(1%)	1	450	1304892	1305344	2e-32	152 bits(82)	56.38
Uniq141	CP066681.1	Micavibrio aeruginosavorus	333/456(73%)	450		9/456(1%)	1	450	1304892	1305344	2e-32	152 bits(82)	56.38
Uniq143	CP073759.1	Methylophilaceae bacterium	359/445(81%)	441		5/445(1%)	10	450	115031	115474	5e-89	340 bits(184)	57.94
Uniq144	CP066681.1	Micavibrio aeruginosavorus	336/460(73%)	450		17/460(3%)	1	450	1304892	1305344	1e-30	147 bits(79)	56.82
Uniq147	CP001672.1	Methylotenera mobilis	364/442(82%)	440		4/442(0%)	1	440	1077921	1078360	3e-101	381 bits(206)	58.17
Uniq152	CP066681.1	Micavibrio aeruginosavorus	333/456(73%)	450		9/456(1%)	1	450	1304892	1305344	2e-32	152 bits(82)	56.6
Uniq156	CP001672.1	Methylotenera mobilis	363/442(82%)	440		4/442(0%)	1	440	1077921	1078360	1e-99	375 bits(203)	58.39
Uniq158	CP066681.1	Micavibrio aeruginosavorus	332/456(73%)	450		9/456(1%)	1	450	1304892	1305344	1e-30	147 bits(79)	56.38
Uniq159	CP073759.1	Methylophilaceae bacterium	366/454(81%)	450		5/454(1%)	1	450	115031	115483	1e-90	346 bits(187)	57.94
Uniq164	CP066681.1	Micavibrio aeruginosavorus	333/456(73%)	450		9/456(1%)	1	450	1304892	1305344	2e-32	152 bits(82)	56.6
Uniq165	CP073759.1	Methylophilaceae bacterium	362/448(81%)	444		5/448(1%)	7	450	115031	115477	1e-90	346 bits(187)	57.72
Uniq166	CP073759.1	Methylophilaceae bacterium	366/454(81%)	450		5/454(1%)	1	450	115031	115483	1e-90	346 bits(187)	58.17
Uniq170	CP073759.1	Methylophilaceae bacterium	364/451(81%)	447		5/451(1%)	4	450	115031	115480	1e-90	346 bits(187)	57.72
Uniq173	CP043320.1	Pseudomonas sp.	278/378(74%)	373		10/378(2%)	1	373	1233731	1234103	2e-27	135 bits(73)	56.38
Uniq174	CP001672.1	Methylotenera mobilis	363/442(82%)	440		4/442(0%)	1	440	1077921	1078360	1e-99	375 bits(203)	57.94
Uniq179	CP073759.1	Methylophilaceae bacterium	367/454(81%)	450		5/454(1%)	1	450	115031	115483	2e-92	351 bits(190)	58.17
Uniq187	CP001672.1	Methylotenera mobilis	362/442(82%)	440		4/442(0%)	1	440	1077921	1078360	6e-98	370 bits(200)	58.17
Uniq200	CP073759.1	Methylophilaceae bacterium	359/445(81%)	441		5/445(1%)	10	450	115031	115474	5e-89	340 bits(184)	57.72
Uniq204	CP073759.1	Methylophilaceae bacterium	352/441(80%)	437		5/441(1%)	4	440	115041	115480	8e-82	316 bits(171)	56.82
Uniq217	CP073759.1	Methylophilaceae bacterium	362/448(81%)	444		5/448(1%)	7	450	115031	115477	1e-90	346 bits(187)	57.94
Uniq219	CP073759.1	Methylophilaceae bacterium	355/444(80%)	440		5/444(1%)	1	440	115041	115483	2e-83	322 bits(174)	57.05
Uniq221	CP066681.1	Micavibrio aeruginosavorus	332/456(73%)	450		9/456(1%)	1	450	1304892	1305344	1e-30	147 bits(79)	56.82
Uniq223	CP066681.1	Micavibrio aeruginosavorus	332/456(73%)	450		9/456(1%)	1	450	1304892	1305344	1e-30	147 bits(79)	56.6
Uniq225	CP066681.1	Micavibrio aeruginosavorus	336/460(73%)	450		17/460(3%)	1	450	1304892	1305344	1e-30	147 bits(79)	57.05
Uniq226	CP073759.1	Methylophilaceae bacterium	359/445(81%)	441		5/445(1%)	10	450	115031	115474	5e-89	340 bits(184)	57.72
Uniq227	CP073759.1	Methylophilaceae bacterium	359/445(81%)	441		5/445(1%)	10	450	115031	115474	5e-89	340 bits(184)	57.94
Uniq235	CP066681.1	Micavibrio aeruginosavorus	333/456(73%)	450		9/456(1%)	1	450	1304892	1305344	2e-32	152 bits(82)	56.38
Uniq238	CP073759.1	Methylophilaceae bacterium	362/448(81%)	444		5/448(1%)	7	450	115031	115477	1e-90	346 bits(187)	57.72
Uniq239	CP073759.1	Methylophilaceae bacterium	367/454(81%)	450		5/454(1%)	1	450	115031	115483	2e-92	351 bits(190)	57.94
Uniq242	CP073759.1	Methylophilaceae bacterium	359/445(81%)	441		5/445(1%)	10	450	115031	115474	5e-89	340 bits(184)	57.94
Uniq248	CP073759.1	Methylophilaceae bacterium	366/454(81%)	450		5/454(1%)	1	450	115031	115483	1e-90	346 bits(187)	57.94
Uniq251	CP066681.1	Micavibrio aeruginosavorus	332/456(73%)	450		9/456(1%)	1	450	1304892	1305344	1e-30	147 bits(79)	56.82
Uniq254	CP073759.1	Methylophilaceae bacterium	366/454(81%)	450		5/454(1%)	1	450	115031	115483	1e-90	346 bits(187)	58.17
Uniq2579													54.59
Uniq258	CP066681.1	Micavibrio aeruginosavorus	332/456(73%)	450		9/456(1%)	1	450	1304892	1305344	1e-30	147 bits(79)	56.6
Uniq259	CP066681.1	Micavibrio aeruginosavorus	333/456(73%)	450		9/456(1%)	1	450	1304892	1305344	2e-32	152 bits(82)	56.38
Uniq262	CP001672.1	Methylotenera mobilis	363/442(82%)	440		4/442(0%)	1	440	1077921	1078360	1e-99	375 bits(203)	57.94
Uniq264	CP066681.1	Micavibrio aeruginosavorus	333/456(73%)	450		9/456(1%)	1	450	1304892	1305344	2e-32	152 bits(82)	56.6
Uniq267	CP066681.1	Micavibrio aeruginosavorus	334/456(73%)	450		9/456(1%)	1	450	1304892	1305344	5e-34	158 bits(85)	56.6
Uniq269	CP001672.1	Methylotenera mobilis	362/442(82%)	440		4/442(0%)	1	440	1077921	1078360	6e-98	370 bits(200)	58.17
Uniq2702	CP073759.1	Methylophilaceae bacterium	362/451(80%)	447		5/451(1%)	4	450	115031	115480	2e-87	335 bits(181)	58.84
Uniq273	CP066681.1	Micavibrio aeruginosavorus	333/456(73%)	450		9/456(1%)	1	450	1304892	1305344	2e-32	152 bits(82)	56.82
Uniq275	CP066681.1	Micavibrio aeruginosavorus	332/456(73%)	450		9/456(1%)	1	450	1304892	1305344	1e-30	147 bits(79)	56.6
Uniq276	CP066681.1	Micavibrio aeruginosavorus	332/456(73%)	450		9/456(1%)	1	450	1304892	1305344	1e-30	147 bits(79)	56.38
Uniq279	CP066681.1	Micavibrio aeruginosavorus	332/456(73%)	450		9/456(1%)	1	450	1304892	1305344	1e-30	147 bits(79)	56.6
Uniq280	CP043320.1	Pseudomonas sp.	278/378(74%)	373		10/378(2%)	1	373	1233731	1234103	2e-27	135 bits(73)	56.6
Uniq282	CP066681.1	Micavibrio aeruginosavorus	332/456(73%)	450		9/456(1%)	1	450	1304892	1305344	1e-30	147 bits(79)	56.38
Uniq284	CP066681.1	Micavibrio aeruginosavorus	332/456(73%)	450		9/456(1%)	1	450	1304892	1305344	1e-30	147 bits(79)	56.82
Uniq287	CP073759.1	Methylophilaceae bacterium	352/441(80%)	437		5/441(1%)	4	440	115041	115480	8e-82	316 bits(171)	56.82
Uniq288	CP066681.1	Micavibrio aeruginosavorus	332/456(73%)	450		9/456(1%)	1	450	1304892	1305344	1e-30	147 bits(79)	56.38
Uniq2955	CP064988.1	Rhodospirillales bacterium	204/265(77%)	262		6/265(2%)	73	334	603008	603269	1e-30	147 bits(79)	52.13
Uniq3057													54.81
Uniq308	CP073759.1	Methylophilaceae bacterium	353/441(80%)	437		5/441(1%)	4	440	115041	115480	2e-83	322 bits(174)	56.82
Uniq315	CP058348.1	Bdellovibrio sp.	82/92(89%)	91		1/92(1%)	139	229	6917	7008	1e-20	113 bits(61)	56.6
Uniq318	CP058348.1	Bdellovibrio sp.	82/92(89%)	91		1/92(1%)	139	229	6917	7008	1e-20	113 bits(61)	56.38
Uniq319	CP066681.1	Micavibrio aeruginosavorus	333/456(73%)	450		9/456(1%)	1	450	1304892	1305344	2e-32	152 bits(82)	57.05
Uniq321	CP073759.1	Methylophilaceae bacterium	359/445(81%)	441		5/445(1%)	10	450	115031	115474	5e-89	340 bits(184)	57.72
Uniq3225	CP064988.1	Rhodospirillales bacterium	204/265(77%)	262		6/265(2%)	73	334	603008	603269	1e-30	147 bits(79)	52.35
Uniq329	CP073759.1	Methylophilaceae bacterium	362/448(81%)	444		5/448(1%)	7	450	115031	115477	1e-90	346 bits(187)	57.94
Uniq330	CP001672.1	Methylotenera mobilis	359/442(81%)	440		4/442(0%)	1	440	1077921	1078360	6e-93	353 bits(191)	57.05
Uniq331	CP066681.1	Micavibrio aeruginosavorus	332/456(73%)	450		9/456(1%)	1	450	1304892	1305344	1e-30	147 bits(79)	56.6
Uniq334	CP001672.1	Methylotenera mobilis	360/442(81%)	440		4/442(0%)	1	440	1077921	1078360	1e-94	359 bits(194)	57.27
Uniq339	CP058348.1	Bdellovibrio sp.	82/92(89%)	91		1/92(1%)	139	229	6917	7008	1e-20	113 bits(61)	56.82
Uniq341	CP066681.1	Micavibrio aeruginosavorus	332/456(73%)	450		9/456(1%)	1	450	1304892	1305344	1e-30	147 bits(79)	56.38
Uniq347	CP066681.1	Micavibrio aeruginosavorus	333/456(73%)	450		9/456(1%)	1	450	1304892	1305344	2e-32	152 bits(82)	56.82
Uniq348	CP073759.1	Methylophilaceae bacterium	356/444(80%)	440		5/444(1%)	1	440	115041	115483	4e-85	327 bits(177)	57.05
Uniq3502	CP051298.1	Alicycliphilus denitrificans	61/71(86%)	71		0/71(0%)	136	206	2761895	2761965	2e-09	76.8 bits(41)	57.27
Uniq351	CP058348.1	Bdellovibrio sp.	82/92(89%)	91		1/92(1%)	139	229	6917	7008	1e-20	113 bits(61)	56.6
Uniq366	CP043320.1	Pseudomonas sp.	279/378(74%)	373		10/378(2%)	1	373	1233731	1234103	5e-29	141 bits(76)	56.38
Uniq369	CP073759.1	Methylophilaceae bacterium	359/445(81%)	441		5/445(1%)	10	450	115031	115474	5e-89	340 bits(184)	57.94
Uniq3748													54.81
Uniq379	CP066681.1	Micavibrio aeruginosavorus	333/456(73%)	450		9/456(1%)	1	450	1304892	1305344	2e-32	152 bits(82)	56.82
Uniq383	CP073759.1	Methylophilaceae bacterium	352/441(80%)	437		5/441(1%)	4	440	115041	115480	8e-82	316 bits(171)	56.82
Uniq388	CP066681.1	Micavibrio aeruginosavorus	332/456(73%)	450		9/456(1%)	1	450	1304892	1305344	1e-30	147 bits(79)	56.6
Uniq390	CP066681.1	Micavibrio aeruginosavorus	332/456(73%)	450		9/456(1%)	1	450	1304892	1305344	1e-30	147 bits(79)	56.6
Uniq391	CP066681.1	Micavibrio aeruginosavorus	332/456(73%)	450		9/456(1%)	1	450	1304892	1305344	1e-30	147 bits(79)	56.6
Uniq393	CP072598.1	Erwinia gerundensis	271/370(73%)	365		10/370(2%)	1	365	1134917	1135281	1e-24	126 bits(68)	56.38
Uniq402	CP043320.1	Pseudomonas sp.	279/378(74%)	373		10/378(2%)	1	373	1233731	1234103	5e-29	141 bits(76)	56.38
Uniq4062	LT906451.1	Legionella lansingensis	348/459(76%)	450		15/459(3%)	1	450	1137239	1137691	2e-52	219 bits(118)	55.93
Uniq418	CP073759.1	Methylophilaceae bacterium	355/444(80%)	440		5/444(1%)	1	440	115041	115483	2e-83	322 bits(174)	57.05
Uniq4220	CP073759.1	Methylophilaceae bacterium	365/454(80%)	450		5/454(1%)	1	450	115031	115483	5e-89	340 bits(184)	59.06
Uniq428	CP073759.1	Methylophilaceae bacterium	347/435(80%)	431		5/435(1%)	10	440	115041	115474	4e-80	311 bits(168)	56.82
Uniq431	CP072598.1	Erwinia gerundensis	270/370(73%)	365		10/370(2%)	1	365	1134917	1135281	7e-23	121 bits(65)	56.6
Uniq4385	CP030104.1	Flagellimonas maritima	73/86(85%)	86		0/86(0%)	136	221	3050532	3050617	7e-13	87.9 bits(47)	58.39
Uniq465	CP066681.1	Micavibrio aeruginosavorus	332/456(73%)	450		9/456(1%)	1	450	1304892	1305344	1e-30	147 bits(79)	56.6
Uniq470	CP073759.1	Methylophilaceae bacterium	353/441(80%)	437		5/441(1%)	4	440	115041	115480	2e-83	322 bits(174)	56.82
Uniq472	CP066681.1	Micavibrio aeruginosavorus	332/456(73%)	450		9/456(1%)	1	450	1304892	1305344	1e-30	147 bits(79)	56.38
Uniq48	CP073759.1	Methylophilaceae bacterium	364/451(81%)	447		5/451(1%)	4	450	115031	115480	1e-90	346 bits(187)	57.72
Uniq488	CP066681.1	Micavibrio aeruginosavorus	333/456(73%)	450		9/456(1%)	1	450	1304892	1305344	2e-32	152 bits(82)	56.6
Uniq492	CP073759.1	Methylophilaceae bacterium	347/435(80%)	431		5/435(1%)	10	440	115041	115474	4e-80	311 bits(168)	57.05
Uniq497	CP073759.1	Methylophilaceae bacterium	354/444(80%)	440		5/444(1%)	1	440	115041	115483	8e-82	316 bits(171)	57.27
Uniq517	CP058348.1	Bdellovibrio sp.	82/92(89%)	91		1/92(1%)	139	229	6917	7008	1e-20	113 bits(61)	56.38
Uniq533	CP058348.1	Bdellovibrio sp.	82/92(89%)	91		1/92(1%)	139	229	6917	7008	1e-20	113 bits(61)	56.38
Uniq541	CP073759.1	Methylophilaceae bacterium	355/444(80%)	440		5/444(1%)	1	440	115041	115483	2e-83	322 bits(174)	57.27
Uniq543	CP058348.1	Bdellovibrio sp.	82/92(89%)	91		1/92(1%)	139	229	6917	7008	1e-20	113 bits(61)	56.82
Uniq544	CP043320.1	Pseudomonas sp.	278/378(74%)	373		10/378(2%)	1	373	1233731	1234103	2e-27	135 bits(73)	56.6
Uniq563	CP073759.1	Methylophilaceae bacterium	352/441(80%)	437		5/441(1%)	4	440	115041	115480	8e-82	316 bits(171)	56.82
Uniq566	CP073759.1	Methylophilaceae bacterium	350/438(80%)	434		5/438(1%)	7	440	115041	115477	8e-82	316 bits(171)	57.05
Uniq569	CP073759.1	Methylophilaceae bacterium	354/444(80%)	440		5/444(1%)	1	440	115041	115483	8e-82	316 bits(171)	57.05
Uniq571	CP001672.1	Methylotenera mobilis	360/442(81%)	440		4/442(0%)	1	440	1077921	1078360	1e-94	359 bits(194)	57.49
Uniq574	CP043320.1	Pseudomonas sp.	278/378(74%)	373		10/378(2%)	1	373	1233731	1234103	2e-27	135 bits(73)	56.82
Uniq582	CP073759.1	Methylophilaceae bacterium	350/438(80%)	434		5/438(1%)	7	440	115041	115477	8e-82	316 bits(171)	56.82
Uniq587	CP043320.1	Pseudomonas sp.	279/378(74%)	373		10/378(2%)	1	373	1233731	1234103	5e-29	141 bits(76)	56.6
Uniq593	CP072598.1	Erwinia gerundensis	270/370(73%)	365		10/370(2%)	1	365	1134917	1135281	7e-23	121 bits(65)	56.38
Uniq598	CP021973.1	Methylophaga nitratireducenticrescens	172/223(77%)	218		10/223(4%)	2	219	2145173	2145390	7e-23	121 bits(65)	56.82
Uniq609	CP058348.1	Bdellovibrio sp.	82/92(89%)	91		1/92(1%)	139	229	6917	7008	1e-20	113 bits(61)	56.38
Uniq618	CP058348.1	Bdellovibrio sp.	82/92(89%)	91		1/92(1%)	139	229	6917	7008	1e-20	113 bits(61)	56.6
Uniq619	CP058348.1	Bdellovibrio sp.	82/92(89%)	91		1/92(1%)	139	229	6917	7008	1e-20	113 bits(61)	57.05
Uniq630	CP073759.1	Methylophilaceae bacterium	354/444(80%)	440		5/444(1%)	1	440	115041	115483	8e-82	316 bits(171)	57.27
Uniq632	CP073759.1	Methylophilaceae bacterium	347/435(80%)	431		5/435(1%)	10	440	115041	115474	4e-80	311 bits(168)	56.82
Uniq638	CP001672.1	Methylotenera mobilis	360/442(81%)	440		4/442(0%)	1	440	1077921	1078360	1e-94	359 bits(194)	57.05
Uniq64	CP073759.1	Methylophilaceae bacterium	367/454(81%)	450		5/454(1%)	1	450	115031	115483	2e-92	351 bits(190)	57.94
Uniq651	CP073759.1	Methylophilaceae bacterium	355/444(80%)	440		5/444(1%)	1	440	115041	115483	2e-83	322 bits(174)	57.05
Uniq662	CP043320.1	Pseudomonas sp.	280/378(74%)	373		10/378(2%)	1	373	1233731	1234103	1e-30	147 bits(79)	56.38
Uniq665	CP058348.1	Bdellovibrio sp.	82/92(89%)	91		1/92(1%)	139	229	6917	7008	1e-20	113 bits(61)	56.6
Uniq679	CP043320.1	Pseudomonas sp.	279/378(74%)	373		10/378(2%)	1	373	1233731	1234103	5e-29	141 bits(76)	56.6
Uniq695	CP058348.1	Bdellovibrio sp.	82/92(89%)	91		1/92(1%)	139	229	6917	7008	1e-20	113 bits(61)	56.82
Uniq696	CP058348.1	Bdellovibrio sp.	82/92(89%)	91		1/92(1%)	139	229	6917	7008	1e-20	113 bits(61)	56.6
Uniq705	CP073759.1	Methylophilaceae bacterium	347/435(80%)	431		5/435(1%)	10	440	115041	115474	4e-80	311 bits(168)	56.82
Uniq716	CP001672.1	Methylotenera mobilis	359/442(81%)	440		4/442(0%)	1	440	1077921	1078360	6e-93	353 bits(191)	57.05
Uniq731	CP058348.1	Bdellovibrio sp.	82/92(89%)	91		1/92(1%)	139	229	6917	7008	1e-20	113 bits(61)	56.82
Uniq74	CP066681.1	Micavibrio aeruginosavorus	333/456(73%)	450		9/456(1%)	1	450	1304892	1305344	2e-32	152 bits(82)	56.38
Uniq744	CP058348.1	Bdellovibrio sp.	82/92(89%)	91		1/92(1%)	139	229	6917	7008	1e-20	113 bits(61)	56.38
Uniq750	CP058348.1	Bdellovibrio sp.	82/92(89%)	91		1/92(1%)	139	229	6917	7008	1e-20	113 bits(61)	56.6
Uniq752	CP001672.1	Methylotenera mobilis	359/442(81%)	440		4/442(0%)	1	440	1077921	1078360	6e-93	353 bits(191)	57.27
Uniq76	CP001672.1	Methylotenera mobilis	363/442(82%)	440		4/442(0%)	1	440	1077921	1078360	1e-99	375 bits(203)	58.17
Uniq762	CP073759.1	Methylophilaceae bacterium	347/435(80%)	431		5/435(1%)	10	440	115041	115474	4e-80	311 bits(168)	57.05
Uniq827	CP067099.1	Providencia vermicola	173/217(80%)	213		8/217(3%)	1	213	1870358	1870570	9e-32	150 bits(81)	57.49
Uniq849	CP058348.1	Bdellovibrio sp.	82/92(89%)	91		1/92(1%)	139	229	6917	7008	1e-20	113 bits(61)	56.6
Uniq871	CP058348.1	Bdellovibrio sp.	82/92(89%)	91		1/92(1%)	139	229	6917	7008	1e-20	113 bits(61)	56.6
Uniq873	AP021888.1	Thiosulfativibrio zosterae	164/212(77%)	209		6/212(2%)	2	210	1478952	1479160	7e-23	121 bits(65)	56.6
Uniq879	CP058348.1	Bdellovibrio sp.	82/92(89%)	91		1/92(1%)	139	229	6917	7008	1e-20	113 bits(61)	56.38
Uniq88	CP001672.1	Methylotenera mobilis	362/442(82%)	440		4/442(0%)	1	440	1077921	1078360	6e-98	370 bits(200)	57.94
Uniq881	CP058348.1	Bdellovibrio sp.	82/92(89%)	91		1/92(1%)	139	229	6917	7008	1e-20	113 bits(61)	56.6
Uniq92	CP073759.1	Methylophilaceae bacterium	365/451(81%)	447		5/451(1%)	4	450	115031	115480	2e-92	351 bits(190)	57.72
Uniq939	CP058348.1	Bdellovibrio sp.	82/92(89%)	91		1/92(1%)	139	229	6917	7008	1e-20	113 bits(61)	56.6
Uniq95	CP073759.1	Methylophilaceae bacterium	368/454(81%)	450		5/454(1%)	1	450	115031	115483	5e-94	357 bits(193)	57.94
Uniq954	CP058348.1	Bdellovibrio sp.	82/92(89%)	91		1/92(1%)	139	229	6917	7008	1e-20	113 bits(61)	56.82
